1 **The amplitude of fNIRS hemodynamic response in the visual cortex unmasks**  
2 **autistic traits in typically developing children**

3

4 Raffaele Mazziotti<sup>1,2‡</sup>, Elena Scaffei<sup>2,3‡</sup>, Eugenia Conti<sup>3</sup>, Viviana Marchi<sup>3</sup>, Riccardo Rizzi<sup>2,3</sup>,  
5 Giovanni Cioni<sup>3,4</sup>, Roberta Battini<sup>3,4</sup>, Laura Baroncelli<sup>1,3\*</sup>

6

7 [1] Institute of Neuroscience, National Research Council (CNR), I-56124, Pisa, Italy

8 [2] Department of Neuroscience, Psychology, Drug Research and Child Health NEUROFARBA, University of  
9 Florence, I-50135, Florence, Italy

10 [3] Department of Developmental Neuroscience, IRCCS Stella Maris Foundation, I-56128, Pisa, Italy

11 [4] Department of Clinical and Experimental Medicine, University of Pisa, Pisa, Italy

12

13 \*To whom correspondence should be addressed: [baroncelli@in.cnr.it](mailto:baroncelli@in.cnr.it)

14 ‡These authors equally contributed to the work

15

16

17

18

19

20

21

22

23

24

25

26

27

28

29

30

31

32

33

34

35

36

37

38

39 **Abstract**

40 **Autistic traits represent a continuum dimension across the population, with**  
41 **autism spectrum disorder (ASD) being the extreme end of the distribution.**  
42 **Accumulating evidence shows that neuroanatomical and neurofunctional**  
43 **profiles described in relatives of ASD individuals reflect an intermediate**  
44 **neurobiological pattern between the clinical population and healthy controls.**  
45 **This suggests that quantitative measures detecting autistic traits in the**  
46 **general population represent potential candidates for the development of**  
47 **biomarkers identifying early pathophysiological processes associated with**  
48 **ASD. Functional near-infrared spectroscopy (fNIRS) has been extensively**  
49 **employed to investigate neural development and function. In contrast, the**  
50 **potential of fNIRS to define reliable biomarkers of brain activity has been**  
51 **barely explored. Features of non-invasiveness, portability, ease of**  
52 **administration and low-operating costs make fNIRS a suitable instrument to**  
53 **assess brain function for differential diagnosis, follow-up, analysis of**  
54 **treatment outcomes and personalized medicine in several neurological**  
55 **conditions. Here, we introduce a novel standardized procedure with high**  
56 **entertaining value to measure hemodynamic responses (HDR) in the occipital**  
57 **cortex of adult subjects and children. We found that the variability of evoked**  
58 **HDR correlates with the autistic traits of children, assessed by the Autism-**  
59 **Spectrum Quotient. Interestingly, HDR amplitude was especially linked to**  
60 **social and communication features, representing the core symptoms of ASD.**  
61 **These findings establish a quick and easy strategy for measuring visually-**  
62 **evoked cortical activity with fNIRS that optimize the compliance of young**  
63 **subjects, setting the background for testing the diagnostic value of fNIRS**  
64 **visual measurements in the ASD clinical population.**

65

66

67

68

69

70

71

72

## 73 **Introduction**

74 Autism spectrum disorder (ASD) is a heterogeneous developmental condition that  
75 involves persistent challenges in social interactions, restricted/repetitive behaviors,  
76 and the lack of behavioral and cognitive flexibility<sup>1</sup>. Since the pioneering work by  
77 Lorna Wing<sup>2</sup>, increasing epidemiological evidence indicates that autistic traits are  
78 continuously distributed across the general population<sup>3,4</sup>. This is due to the complex  
79 genetic and epigenetic inheritance pattern of ASD, where multiple candidate loci  
80 contribute to the pathogenesis of the disease<sup>5,6</sup>. Milder autistic traits have been  
81 termed the extended or broader autism phenotype (BAP), with BAP features being  
82 particularly prevalent in first- and second-degree relatives of individuals with ASD<sup>6-9</sup>.  
83 Since ASD and broader autistic manifestations share common genetic variants and  
84 neurobiological susceptibility factors<sup>10</sup>, the general population emerges as a suitable  
85 testing bed for the development of quantitative measures detecting neurostructural  
86 and neurofunctional hallmarks of autism.

87 Over the last decade, the biological dimension of ASD has been largely  
88 explored, thanks to the growing availability of advanced tools to explore brain  
89 correlates of neurological disorders, including high-density EEG,  
90 magnetoencephalography, positron emission tomography, magnetic resonance  
91 imaging (MRI), and functional near-infrared spectroscopy (fNIRS)<sup>8,11,12</sup>. A number of  
92 studies reported defective neuroanatomical and neurofunctional features in  
93 individuals with ASD, suggesting that a dysfunction of specific brain areas might  
94 underlie the core symptoms of ASD<sup>13-17</sup>. Interestingly, similar neurological profiles  
95 describe the relatives of autistic probands<sup>8</sup>.

96 fNIRS is an optical imaging technique that allows quantifying oxygen  
97 consumption in different regions of the cerebral cortex, providing an indirect measure  
98 of neuronal activity<sup>18,19</sup>. This blood-oxygen-level-dependent (BOLD) signal is similar  
99 to that detected with functional MRI (fMRI)<sup>20</sup>. However, fNIRS is more tolerant to  
100 motion artifacts than fMRI, and the development of robust methods for motion  
101 detection and correction allowed to avoid sedation in children<sup>21,22</sup>. Furthermore,  
102 fNIRS has the advantage of being totally non-invasive, low-cost, portable, noiseless,  
103 and endowed with high experimental flexibility and no setting constraints. This  
104 methodological strength provides the fNIRS with a high ecological value for  
105 investigating neural circuit maturation either in typically developing children or  
106 clinically relevant populations<sup>21,23</sup>.

107           Although the use of fNIRS in autism research is still an emerging area, a  
108 number of studies aiming to decipher the neuronal mechanisms and circuits  
109 underlying ASD evaluated different aspects of brain function and organization,  
110 including resting-state and task-evoked responses<sup>24,25</sup>. Coherence analyses of  
111 resting-state hemodynamic activity showed weaker local and interhemispheric  
112 functional connectivity in different cortical regions<sup>26-31</sup>. Moreover, individuals on the  
113 autism spectrum present patterns of atypical activity, including reduced  
114 hemodynamic responses within specific brain regions, bilateral differences in  
115 neuronal activation and the lack of cortical specialization, in tasks ranging from  
116 sensory perception<sup>32</sup> to executive functions<sup>33</sup>, social perception<sup>34-37</sup>, joint attention<sup>38-</sup>  
117 <sup>40</sup>, imitation<sup>41,42</sup>, facial and emotional processing<sup>43-46</sup>, speech perception and  
118 language<sup>47-50</sup>. The majority of studies targeting evoked brain activity was focused on  
119 the prefrontal and the temporal cortex<sup>25</sup>, where symptom severity seems to be  
120 inversely correlated with the degree of cortical activation<sup>42,43</sup>.

121           Growing evidence suggests that fNIRS might be a candidate biomarker for  
122 several neuropsychiatric disorders, including ASD<sup>29,51-55</sup>. In particular, functional  
123 network efficiency<sup>29</sup>, weighted separability of NIRS signals<sup>56</sup>, multi-layer neural  
124 networks and sample entropy of spontaneous hemodynamic fluctuations<sup>54,57</sup> have  
125 been proposed as auxiliary diagnosis indexes for ASD. However, all these  
126 approaches require complex algorithms to extract high-level features from the fNIRS  
127 raw data, while fitness, applicability and translational value of biomarkers greatly  
128 depend on their ease of use. In this framework, the analysis of visual phenotype has  
129 become an important model to evaluate cortical processing in different  
130 neurodevelopmental conditions<sup>58-63</sup>. Indeed, electrophysiological measurement of  
131 visually evoked responses has been introduced as a quantitative method to assess  
132 brain function in Rett syndrome<sup>58,64</sup>, and hemodynamic responses (HDR) emerged  
133 as a potential longitudinal biomarker for CDKL5 Deficiency Disorder and Creatine  
134 Transporter Deficiency in murine models<sup>62,63</sup>.

135           Since clinical studies suggested a dysregulation of sensory processing and  
136 functional connectivity in the visual cortex of ASD subjects<sup>65-67</sup>, we hypothesized that  
137 fNIRS visual measures could be related to broad autism dimensions in the general  
138 population. To address this issue, we developed a novel standardized procedure to  
139 assess HDR changes in the occipital cortex testing 40 randomly selected neuro-

140 typical adults and 19 children, and measuring inter-individual differences in autistic  
141 traits, using the Autism-Spectrum Quotient (AQ<sup>68,69</sup>).

142

## 143 **Results**

### 144 **An animated cartoon-based stimulus is able to evoke visual responses in the** 145 **adult cortex**

146 We measured the cortical HDR function<sup>70</sup> elicited by a reversing checkerboard  
147 pattern in the adult population. In agreement with the previous literature<sup>71,72</sup>, we  
148 obtained a significant activation of the occipital cortex in response to different  
149 conditions of visual stimulation (Fig. 1 and Fig. S1). Grand averages across adult  
150 participants (see Table 1 for demographics) of Total Hb (THb), OxyHb (OHb) and  
151 DeoxyHb (DHb) concentration changes are plotted in Fig. 2. Using a classic mean-  
152 luminance grey screen as baseline, statistical analysis revealed a significant main  
153 effect of the checkerboard stimulus (S) with respect to the blank presentation for all  
154 HDR metrics (Radial Stimulus condition, RS, Fig. 2A).

155 To increase the entertaining quality of our experimental paradigm, we devised  
156 an innovative visual stimulation protocol blending the checkerboard pattern with an  
157 isoluminant commercial cartoon, thus serving as a reference baseline (Fig. 1 and  
158 Fig. S1). We found a significant increase of THb and OHb, with a parallel reduction  
159 of DHb concentration, in response to S appearance, reflecting the functional  
160 activation of visual areas in this condition as well. The cortical response was  
161 independent from the cartoon employed as baseline: a comparable HDR, indeed,  
162 was clearly elicited both when the baseline movie was fixed a priori by the  
163 experimenter (Cartoon Fixed condition, CF; Fig. 2B) and when the cartoon was  
164 freely selected by the tested subject (Cartoon Chosen condition, CC; Fig. 2C).  
165 Interestingly, a significant pattern of correlations emerged among HDR metrics  
166 recorded with different stimulating conditions (Fig. S2), indicating that the quality of  
167 visual input does not quantitatively impact HDR. The amplitude of cortical activation  
168 was only slightly smaller in response to CF and CC, with the range of OHb and DHb  
169 fluctuations being significantly lower with respect to that evoked by RS (Fig. 2D).

170 Within the CF condition, we also established that the baseline cartoon does  
171 not affect the degree of visual activation: indeed, a comparable modification of THb,  
172 OHb and DHb concentrations was recorded using “The Lion King”, “The Powerpuff  
173 Girls”, “Peppa Pig” or “Kung Fu Panda” (Fig. S3A). Furthermore, no differences of

174 visually evoked responses were detected modulating the contrast level of the  
175 baseline cartoon: THb, OHb and DHb fluctuations, indeed, were comparable when a  
176 fixed baseline cartoon was presented at 20%, 40%, or 80% of contrast (Fig. 2E; Fig.  
177 S3B-D). Finally, the response latency was homogenous in RS, CF, and CC  
178 conditions (Fig. S4A).

179 Altogether, these results demonstrate the validity of this innovative stimulation  
180 procedure to evoke a significant and reliable response in the occipital cortex  
181 preserving inter-subject variability.

182

### 183 **The cartoon paradigm was reliable in eliciting cortical responses in children**

184 We measured cortical responses in typically developing children (see Table 2 for  
185 demographics) viewing the radial checkerboard blended with the animated cartoon.  
186 We compared three different conditions: each subject, indeed, was asked to select  
187 two cartoons of their preference for the baseline and the first choice was employed  
188 for the low-contrast (cartoon 1 low contrast, 20%, L1) and the high-contrast (cartoon  
189 1 high contrast, 80%, H1) stimulation, while the second cartoon was presented only  
190 at low-contrast (cartoon 2 low contrast, L2; Fig. S1).

191 Our data showed a significant activation of the visual cortex, with a prominent  
192 change of THb, OHb and DHb concentration in response to the S with respect to the  
193 blank for all conditions tested (Fig. 3A-C). The amplitude of elicited cortical  
194 responses was comparable following L1, H1 and L2 (Fig. 3D), proving that the HDR  
195 is independent from the cartoon narrative selected for the baseline and the contrast  
196 level of baseline presentation in children as well. Small differences were observed  
197 for response latency among L1, H1 and L2 conditions (Fig. S4B). A highly significant  
198 pattern of correlations among different HDR indexes recorded in the diverse  
199 conditions was detected (Fig. S5).

200 In agreement with previous literature<sup>72</sup>, a maturational trend of cortical  
201 responsivity was recognized, with children showing significantly higher HDR  
202 amplitude with respect to adult subjects (Fig. 3E). On the contrary, age-dependent  
203 effects were not identified for response latency (Fig. S4C).

204 These findings establish a novel method for measuring visually-evoked  
205 cortical activity with fNIRS that ensures an elevated compliance of young subjects  
206 and high-quality reliability of measurements, suggesting a valuable tool for studying

207 visual cortical processing in typically developing children, but also in clinically  
208 relevant populations.

209

### 210 **Negative correlation of HDR amplitude with AQ score**

211 Despite no effects detectable in adults (Fig. 4A-C), the amplitude of visual responses  
212 was highly correlated to AQ scores in children (Fig. 4D-E). Consistent with a recent  
213 work<sup>54</sup>, the correlation was specific for THb, with higher AQ score being associated  
214 with a lower amplitude of THb visually-evoked signals (Fig. 4D-E).

215 Interestingly, HDR amplitude was especially linked to social and  
216 communication autistic traits (Fig. 5, S6): indeed, assessing separately the five AQ  
217 subscales<sup>69</sup> we found a significant correlation of THb and OHb with the Social Skills  
218 subscale (AQ\_S, Fig. 5A-B), while only THb modulation was related to the  
219 Communication subscale (AQ\_C, Fig. 5C-D). Given the reliability across different  
220 visual tasks (L1 and H1), the strongest interaction was between THb and AQ\_S (Fig.  
221 5A-B).

222

### 223 **Discussion**

224 We measured hemodynamic responses in the occipital cortex while subjects viewed  
225 a reversing checkerboard pattern on a grey isoluminant baseline or the same  
226 stimulus blended with a commercial animated cartoon. In all participants, the  
227 patterned stimulus elicited a significant change of cortical Hb (upwards for THb and  
228 OHb, down for DHb) independently from the reference baseline, while no response  
229 was detected following blank presentation. Since HDR consists of an initial increase  
230 in oxygen rich blood followed by a smaller depletion of deoxy-haemoglobin, with a  
231 tight interrelation among total, oxygenated and reduced Hb levels, reporting all data  
232 allows for a more accurate physiological interpretation of the results<sup>70</sup>.

233 Interestingly, the level of occipital cortex activation did not depend on either  
234 the movie selected as reference baseline or the baseline contrast, with only a slight  
235 reduction of OHb and DHb change in response to the stimulus blended to animated  
236 cartoons with respect to the classic RS condition. These data demonstrate the  
237 reliability of this novel procedure with high entertaining and ecological value in  
238 eliciting cortical activity. Thus, our approach might be helpful for studying cortical  
239 function in children with an atypical trajectory of brain development, commonly  
240 showing a reduced compliance in experimental environments.

241           The magnitude of HDR modulation, and in particular of THb, was inversely  
242 correlated with AQ scores in children. Indeed, we found that the higher were the AQ  
243 scores of subjects the lower was the amplitude of THb response to visual  
244 stimulation, suggesting that visually-evoked fNIRS responses are able to capture the  
245 dimension of autistic traits in the general young population. Our findings are  
246 consistent with previous studies showing that cortical activation measured with  
247 fNIRS and the performance in visual psychophysics negatively reflected ASD  
248 symptom severity<sup>42,43,73–76</sup>. Moreover, these data reinforce the concept that THb  
249 changes could provide richer discriminative information for classifying between  
250 typically developing children and ASD subjects<sup>54</sup>. A tentative explanation of reduced  
251 HDR in children with stronger autistic traits might be found in the difference of  
252 perceptual styles in the general population<sup>77,78</sup>: the preference for focusing on local  
253 details vs. the global stimulus configuration, indeed, is a defining feature of ASD<sup>79</sup>  
254 and locally centered perception could be less effective in activating neural circuits of  
255 visual cortex. Interestingly, a recent study established a vascular link to ASD,  
256 showing early dysfunction of endothelial cells and impaired endothelium-dependent  
257 vasodilation in a mouse model of 16p11.2 deletion<sup>80</sup>. Since the HDR measured with  
258 fNIRS strongly relies on neurovascular coupling, this suggests that lower  
259 neurophysiological activity may stem in part from endothelial-dependent vascular  
260 factors. In contrast, we failed to detect any correlation between HDR and AQ scores  
261 in adult subjects. This is likely due to the different dynamic range and amplitude of  
262 HDR responses measured in children and adult participants. Accordingly, the  
263 maturation of neural and vascular networks over the first years of life affects  
264 neurovascular coupling with a pattern of hemodynamic responses significantly  
265 different in developing and adult brain<sup>81</sup>.

266           In our experiment, the THb index describes about 45% of the variance in AQ  
267 scores. This correlation is remarkably high, considering that it is detected across two  
268 separate visual stimulating procedures, i.e., the vision of low- and the high-contrast  
269 blended RS-animated cartoons. Although the autistic questionnaire for children is  
270 well-validated, showing good test-retest reliability and high internal consistency, not  
271 all items have the same validity and factor analysis identified five subscales, named  
272 ‘Social Skills’, ‘Communication’, ‘Attention to Detail’, ‘Imagination’ and ‘Attention  
273 Switching’<sup>69</sup>. We observed variability in the strength of correlation between HDR and  
274 AQ subscales, with the highest correlation for the ‘Social Skills’ and ‘Communication’



275 subscales. Interestingly, ‘Social Skills’ and ‘Communication’ are the subscales with  
276 higher construct validity performance in differentiating individuals with or without  
277 ASD<sup>82,83</sup>, while ‘Attention to Detail’ was the poorest classifying domain<sup>84</sup>. It is also  
278 worth stressing that among the items composing the ‘Attention to Detail’ subscale,  
279 only four actually relate to sensory perception (e.g. ‘My child usually notices details  
280 that others do not’), the others being more focused on cognitive functions (e.g. ‘My  
281 child is fascinated by numbers’). Accordingly, the first pilot report of the AQ  
282 questionnaire showed lower internal consistency (measured by Cronbach’s alpha  
283 coefficient) of ‘Attention to Detail’ items compared to other subscales<sup>68</sup>.

284         Although primarily affecting social functioning, there is a growing body of  
285 evidence showing that ASD is also associated with abnormalities in multiple sensory  
286 domains, fluctuating between hyper- and hypo-sensitivity to sensory stimuli<sup>73,85</sup>. In  
287 addition to a higher incidence of refractive errors and strabismus<sup>86</sup>, anomalies in  
288 visual processing, visual attention and visual-motor integration have been described  
289 in ASD population<sup>66,73,87</sup>. Interestingly, sensory symptoms are correlated with the  
290 severity of the disorder, at least in children<sup>88</sup>. Moreover, commonly observed  
291 alterations in social skills might have a visual component<sup>73</sup> and perception deficits  
292 could impact with cascading effects on the maturation of cognitive and social  
293 domains<sup>87</sup>.

294         It has been recently suggested that an early assessment of pupil size  
295 modulation and visual behavior might improve the diagnostic process of  
296 ASD<sup>66,77,87,89</sup>. Currently, ASD diagnosis and follow-up almost entirely rely on  
297 phenotypic information collected via clinical measures and parental input that are  
298 highly prone to subjective bias<sup>90</sup>. Moreover, the late appearance of some behavioral  
299 autistic traits often delays the diagnosis until mid-childhood<sup>91,92</sup>. Thus, the  
300 identification of solid brain biomarkers early predicting ASD pathophysiology is a  
301 critical step to anticipate tailored interventions, leading to better outcomes for  
302 patients and possibly even the prevention of certain behaviors typically associated  
303 with ASD. Objective biomarkers have also the potential to be helpful in the  
304 management of patients, allowing the classification of disease severity and  
305 monitoring response to treatments<sup>12</sup>. A recent systematic review highlighted that  
306 both functional and structural neuroimaging features might predict ASD diagnosis in  
307 the early pre-symptomatic period<sup>93,94</sup>, but further studies are needed to validate the  
308 promising performance of such biomarkers<sup>12</sup>. Lately, resting-state fNIRS

309 measurements have been suggested as candidate biomarkers for ASD<sup>29,54,56,57</sup>. As  
310 stressed above, fNIRS offers significant advantages with respect to other  
311 neuroimaging tools, including non-invasiveness, ease of use, no need of sedation,  
312 tolerance to movements and portability, making it a child-friendly approach.  
313 However, the extraction of metrics with diagnostic value from resting-state  
314 recordings involves complex algorithms.

315 In contrast, our analysis of visually evoked responses is quick, easy and  
316 requires only that children pay attention to a short movie of their choice. Since our  
317 stimulating strategy has been studied to optimize the compliance of young subjects,  
318 we believe that our results might set the background for testing the predictive value  
319 of fNIRS visual measurements to empower early detection of autistic traits.  
320 Moreover, screening for autistic traits in the general population may be helpful in  
321 epidemiological research because it may provide a large sample size to investigate  
322 the correlation between autism phenotype severity and other pathophysiological  
323 processes<sup>83</sup>.

324

## 325 **Materials and methods**

### 326 **Subjects**

327 We recruited a total of 40 adult subjects (20 women, age:  $31.05 \pm 3.94$  (SD) years)  
328 and 19 children (5 girls, age:  $7.20 \pm 3.01$  (SD) years). All participants reported  
329 normal or corrected-to-normal vision and had no diagnosed neuropsychiatric  
330 condition. Experimental procedures on children were authorized by the Regional  
331 Pediatrics Ethics Board (Comitato Etico Pediatrico Regionale-Azienda Ospedaliero-  
332 Universitaria Meyer-Firenze, Italy; authorization number 201/2019) and were  
333 performed according to the declaration of Helsinki. Written informed consent was  
334 obtained from all adult participants and from the parents of each child, authorizing  
335 the use of anonymized data for research purposes. Assent was also obtained from  
336 the children involved in the study before participation.

337

### 338 **AQ score**

339 Adult participants filled in the Autistic-traits Quotient (AQ) questionnaire, a 50-items  
340 self-administered report validated for the Italian version<sup>68,95</sup>. The items consist of  
341 descriptive statements assessing personal preferences and typical behavior. For  
342 each item, participants respond on a 4-point Likert scale: “strongly agree”, “slightly

343 agree”, “slightly disagree”, and “strongly disagree”. The items are grouped in five  
344 subscales: Social Skills, Communication, Attention to Details, Imagination and  
345 Attention Switching. All the questionnaires were scored by a neuropsychiatrist  
346 blinded to subject data: 1 point was assigned when the participant’s response was  
347 characteristic of ASD (slightly or strongly), 0 points were attributed otherwise. Total  
348 scores range between 0 and 50, with 32 being the clinical threshold for autism risk<sup>68</sup>.  
349 No subjects scoring above 32 points were recorded. The mean (min-max) of the  
350 scores was 15.0 (3-32) with SD of 6.5. Since child self-report might be affected by  
351 reading and comprehension difficulties, the children's version of Autism Spectrum  
352 Quotient (Italian version of AQ-child) was completed by parents<sup>69</sup>. This version of the  
353 AQ questionnaire includes 50 items as well, grouped in the same subscales  
354 described above, and parents were required to report for each statement the degree  
355 of consistency with their child’s behavior. Scores range from 0 to 150, since the  
356 response scale is treated as a 4-point Likert scale with 0 representing definitely  
357 agree; 1 slightly agree; 2 slightly disagree; and 3 definitely disagree. Items were  
358 reverse scored as needed. The threshold score is 76<sup>69</sup>. All subjects scored below 76  
359 points. The mean (min-max) of the scores was 32.1 (17-49) with SD of 10.7.

360

### 361 **Apparatus and montages**

362 To measure changes in total Hb (THb) concentration and relative oxygenation levels  
363 (OHb and DHb) in the occipital cortex during the task, we used a continuous-wave  
364 NIRS system (NIRSport 8x8, NIRx Medical Technologies LLC, Berlin, Germany).  
365 Our NIRSport system consists of 8 red light-sources operating at 760 nm and 850  
366 nm, and 7 detectors which can be placed into a textile EEG cap (EASYCAP,  
367 Herrsching, Germany), forming an array of 22 multi-distant channels<sup>96</sup>. Textile EEG  
368 caps of different sizes were used. The probe arrangement was fixed in each of the  
369 caps using grommets, optode stabilizers, colored labels and holders in order to  
370 assure comparable probe mapping over all subjects. For data recording, the Aurora  
371 Software 1.4.1.1 (NIRx Medical Technologies LLC) was employed. The sampling  
372 rate was 10.2 Hz. Visual areas were identified according to the craniocerebral  
373 topography within the international 10-20 system and the placement of the optodes  
374 was done using fOLD v2.2<sup>97</sup> and NIRSite 2.0 (NIRx Medical Technologies LLC)  
375 softwares. Sources and detectors were symmetrically distributed to define 22  
376 channels around the region of interest, each adjacent pair of sources and detectors

377 defining one channel (min-max source-detector separation: 20-44 mm for adults, 22-  
378 30 mm for children; Fig. S2).

379

## 380 **Experimental Design and Visual Stimulation**

381 Prior to the experiment, adult participants (or parents for children) filled in the AQ  
382 questionnaire. Then, subjects were asked to sit on a comfortable chair and the fNIRS  
383 cap was positioned. Optodes were placed into the cap and the calibration of light  
384 coupling between sensors and detectors was performed. All experimental sessions  
385 lasted 30 minutes. Visual stimuli were generated using Python 3 and Psychopy3<sup>98</sup>  
386 and displayed with gamma correction on a monitor (Sharp LC-32LE352EWH, 60Hz  
387 refresh rate, 45 cd/m<sup>2</sup> mean luminance, resolution of 800×600 pixels) placed 70 cm  
388 from the subject. Cortical hemodynamics in response to full-field, reversing, square  
389 wave, radial checkerboard, with abrupt phase inversion (spatial frequency: 0.33  
390 cycles per degree, temporal frequency: 4 Hz; Fig. 1A) was evaluated in the time  
391 domain by measuring the peak-to-baseline amplitude and latency. To have an  
392 internal control with blank stimulation, we used an event-related design consisting of:  
393 i) 20 cycles of 5 seconds stimulus 'on' (reversing checkerboard, 90% of contrast)  
394 followed by 10 seconds stimulus 'off' and ii) 20 cycles of 5 seconds mock stimulus  
395 'on' (reversing checkerboard, 0% of contrast) followed by 10 seconds stimulus 'off'.  
396 The two stimulating conditions were pseudo randomly interleaved for each subject  
397 during the recording. Blocks lasted 10 minutes and participants were permitted to  
398 take rest between recordings. Fig. 1D shows a schematic representation of the  
399 experimental procedure. Visual events were synchronized with NIRSport over  
400 wireless LAN communication through the Python version of LabStreamingLayer  
401 (<https://github.com/sccn/labstreaminglayer>).

402 Recordings in adult participants- Experiment 1 for adults (exp1) aimed to understand  
403 whether a reliable hemodynamic signal could be recorded in response to the radial  
404 checkerboard merged with an animated cartoon. Thus, exp1 started with a 10-  
405 minutes recording using the reversing checkerboard as stimulus 'on' and the grey  
406 screen as stimulus 'off' (RS condition), and continued with the vision of two different  
407 blended animated cartoons, where the stimulus 'on' was a merge between the  
408 reversing checkerboard and the movie, whereas the stimulus 'off' was the grey-scale  
409 isoluminant cartoon (CF and CC conditions; Fig. S1). The merging procedure was  
410 achieved using Python3 OpenCV<sup>99</sup>. During the appearance of the stimulus each

411 frame was filtered using an automatic Canny edge detection algorithm  
412 ([https://www.pyimagesearch.com/2015/04/06/zero-parameter-automatic-canny-](https://www.pyimagesearch.com/2015/04/06/zero-parameter-automatic-canny-edge-detection-with-python-and-opencv/)  
413 [edge-detection-with-python-and-opencv/](https://www.pyimagesearch.com/2015/04/06/zero-parameter-automatic-canny-edge-detection-with-python-and-opencv/)), then the filtered cartoon was blended with  
414 the radial checkerboard. Each pixel of the animated cartoon with the same color of  
415 the corresponding pixel of the radial checkerboard was inverted, to obtain a fully  
416 visible image. The result was a RS with an overlaid cartoon frame (Fig 1B). The  
417 first cartoon was randomly selected by the operator within a group of 4 (“The Lion  
418 King”, “The Powerpuff Girls”, “Peppa Pig” or “Kung Fu Panda”; CF), whereas the  
419 latter was a free choice of the subject (CC). Exp2, aiming to dissect the contribution  
420 of baseline contrast to visual responses, was performed in a subset of adult  
421 participants (n = 15). Exp2 consisted of 3 consecutive recordings of a CF (“Peppa  
422 Pig”; “Hide-and-see”, “Fly the kite”, “Polly parrot” episodes) with the modulation of  
423 the baseline contrast (20%, 40%, 80%; Fig. S1). The presentation order of different  
424 contrast levels was randomly shuffled.

425 Recordings in children- To confirm that the baseline movie and its contrast do not  
426 affect the emergence of visual responses to the radial checkerboard in children, we  
427 measured hemodynamic signals in response to 2 different blended RS-animated  
428 cartoons freely decided by the subject: cartoon 1 was presented at both low (20%,  
429 L1) and high (80%, H1) contrast, while only low contrast was recorded for cartoon 2  
430 (L2; Fig. S1). In this case, the presentation order was decided by the child, in order  
431 to maximize subject compliance.

432 During the experimental sessions, data were quickly analyzed and visualized using  
433 nirsLAB software (NIRx Medical Technologies LLC, v2019.4).

434

### 435 **Signal Processing and Statistical analysis**

436 Data preprocessing was completed using the Homer3 package (v1.29.8) in MATLAB  
437 (R2020a). We created a processing stream tailored on recent guidelines for analysis  
438 of fNIRS data<sup>22</sup>. First, the raw intensity data were converted to optical density (OD)  
439 changes (*hmR\_Intensity2OD*). Then, channels showing very high or low optical  
440 intensity were excluded from further analyses using the function  
441 *hmR\_PruneChannels* (dRange: 5e-04-1e+00, SNRthresh: 2; SDrange: 0.0-45.0).  
442 Motion artifacts were then removed by a multistep rejection protocol. After a step of  
443 motion artifact detection using the *hmR\_MotionArtifactByChannel* function (tMotion:  
444 1.0, tMask: 1.0; STDEVthresh 13.0; AMPthresh: 0.40), motion correction was

445 performed with a combination of Spline interpolation (*hmR\_MotionCorrectSpline*, p:  
446 0.99) and Wavelet filtering (*hmR\_MotionCorrectWavelet*, iqr: 0.80) functions<sup>22</sup>. The  
447 remaining uncorrected motion artifacts were identified using the  
448 *hmR\_MotionArtifactByChannel*. A band-pass filter (*hmR\_BandpassFilt*:  
449 *Bandpass\_Filter\_OpticalDensity*, hpf: 0.01, lpf: 0.50) was applied to decrease slow  
450 drifts and high-frequency noise, and the OD data were converted to Hb  
451 concentration changes using the modified Beer–Lambert law (*hmR\_OD2Conc*, ppf:  
452 1.0 1.0 1.0). Finally, trials of each subject were block-averaged for every stimulating  
453 condition and channel (*hmR\_BlockAvg: Block\_Average\_on\_Concentration\_Data*,  
454 trange: -2.0 20.0)<sup>22</sup>. The resulting txt file was imported in Python as a Pandas  
455 DataFrame. For each subject, only the channel with the highest response amplitude  
456 was analyzed. The peak response was identified as the maximal value for THb and  
457 OHb and the minimum value for DHb. A grand average was taken of the 20 trials of  
458 data per stimulating condition and differences between visual stimulation ‘on’  
459 (reversing checkerboard) and ‘off’ (blank) were compared. All data were normalised  
460 with respect to the blank-evoked response using a subtraction method. Statistical  
461 analysis was carried out using *pingouin* Python library<sup>100</sup> and the following functions:  
462 *pingouin.ttest* (paired and two-sided t-test), *pingouin.rm\_anova* (one-way repeated  
463 measures ANOVA), *pingouin.pairwise\_ttests* (post-hoc analysis),  
464 *pingouin.pairwise\_corr* (Spearman correlation), *pingouin.regplot* (Linear regression).  
465 T-test, ANOVA and post-hoc analysis were used to assess differences in fNIRS peak  
466 responses following different stimulating conditions, whereas we tested the  
467 interaction between the amplitude of fNIRS measures and AQ scores with Spearman  
468 correlation and we employed the Linear regression to plot such correlation.  
469 Adjustments for multiple comparisons were performed using the Benjamini/Hochberg  
470 false discovery rate (BH-FDR) correction. The effect size calculated for the ANOVA  
471 was the generalized eta-squared. All the plots have been generated using *Matplotlib*  
472 Python library<sup>101</sup>. All statistical metrics and details are reported in Table S1.

473

#### 474 **Data availability**

475 The datasets generated during the current study and scripts used for visual  
476 stimulation are available, respectively on Zenodo  
477 (<http://doi.org/10.5281/zenodo.5101912>) and GitHub website  
478 ([https://github.com/raffaelemazziotti/FNIRS\\_code](https://github.com/raffaelemazziotti/FNIRS_code)).

479

## 480 **References**

- 481 1. Maenner, M. J. *et al.* Potential impact of DSM-5 criteria on autism spectrum  
482 disorder prevalence estimates. *JAMA Psychiatry* **71**, 292–300 (2014).
- 483 2. Wing, L. The Continuum of Autistic Characteristics. *Diagnosis and Assessment*  
484 *in Autism* 91–110 (1988) doi:10.1007/978-1-4899-0792-9\_7.
- 485 3. Posserud, M.-B., Lundervold, A. J. & Gillberg, C. Autistic features in a total  
486 population of 7-9-year-old children assessed by the ASSQ (Autism Spectrum  
487 Screening Questionnaire). *J. Child Psychol. Psychiatry* **47**, 167–175 (2006).
- 488 4. Ruzich, E. *et al.* Measuring autistic traits in the general population: a systematic  
489 review of the Autism-Spectrum Quotient (AQ) in a nonclinical population sample  
490 of 6,900 typical adult males and females. *Mol. Autism* **6**, 2 (2015).
- 491 5. Persico, A. M. & Bourgeron, T. Searching for ways out of the autism maze:  
492 genetic, epigenetic and environmental clues. *Trends Neurosci.* **29**, 349–358  
493 (2006).
- 494 6. Ruzich, E. *et al.* Subgrouping siblings of people with autism: Identifying the  
495 broader autism phenotype. *Autism Res.* **9**, 658–665 (2016).
- 496 7. Piven, J., Palmer, P., Jacobi, D., Childress, D. & Arndt, S. Broader autism  
497 phenotype: evidence from a family history study of multiple-incidence autism  
498 families. *Am. J. Psychiatry* **154**, 185–190 (1997).
- 499 8. Billeci, L. *et al.* The Broad Autism (Endo)Phenotype: Neurostructural and  
500 Neurofunctional Correlates in Parents of Individuals with Autism Spectrum  
501 Disorders. *Front. Neurosci.* **10**, 346 (2016).
- 502 9. Carpita, B. *et al.* The broad autism phenotype in real-life: clinical and functional  
503 correlates of autism spectrum symptoms and rumination among parents of  
504 patients with autism spectrum disorder. *CNS Spectr.* **25**, 765–773 (2020).
- 505 10. Bralten, J. *et al.* Autism spectrum disorders and autistic traits share genetics and  
506 biology. *Mol. Psychiatry* **23**, 1205–1212 (2018).
- 507 11. Pagnozzi, A. M., Conti, E., Calderoni, S., Fripp, J. & Rose, S. E. A systematic  
508 review of structural MRI biomarkers in autism spectrum disorder: A machine  
509 learning perspective. *Int. J. Dev. Neurosci.* **71**, 68–82 (2018).
- 510 12. Frye, R. E. *et al.* Emerging biomarkers in autism spectrum disorder: a systematic  
511 review. *Ann Transl Med* **7**, 792 (2019).

- 512 13. Amaral, D. G., Schumann, C. M. & Nordahl, C. W. Neuroanatomy of autism.  
513 *Trends Neurosci.* **31**, 137–145 (2008).
- 514 14. Bellani, M., Calderoni, S., Muratori, F. & Brambilla, P. Brain anatomy of autism  
515 spectrum disorders I. Focus on corpus callosum. *Epidemiol. Psychiatr. Sci.* **22**,  
516 217–221 (2013).
- 517 15. Bellani, M., Calderoni, S., Muratori, F. & Brambilla, P. Brain anatomy of autism  
518 spectrum disorders II. Focus on amygdala. *Epidemiol. Psychiatr. Sci.* **22**, 309–  
519 312 (2013).
- 520 16. Billeci, L. *et al.* On the application of quantitative EEG for characterizing autistic  
521 brain: a systematic review. *Front. Hum. Neurosci.* **7**, 442 (2013).
- 522 17. Calderoni, S., Bellani, M., Hardan, A. Y., Muratori, F. & Brambilla, P. Basal  
523 ganglia and restricted and repetitive behaviours in Autism Spectrum Disorders:  
524 current status and future perspectives. *Epidemiol. Psychiatr. Sci.* **23**, 235–238  
525 (2014).
- 526 18. Lloyd-Fox, S., Blasi, A. & Elwell, C. E. Illuminating the developing brain: the past,  
527 present and future of functional near infrared spectroscopy. *Neurosci. Biobehav.*  
528 *Rev.* **34**, 269–284 (2010).
- 529 19. Gervain, J. *et al.* Near-infrared spectroscopy: a report from the McDonnell infant  
530 methodology consortium. *Dev. Cogn. Neurosci.* **1**, 22–46 (2011).
- 531 20. Raichle, M. E. & Mintun, M. A. Brain work and brain imaging. *Annu. Rev.*  
532 *Neurosci.* **29**, 449–476 (2006).
- 533 21. Vanderwert, R. E. & Nelson, C. A. The use of near-infrared spectroscopy in the  
534 study of typical and atypical development. *Neuroimage* **85 Pt 1**, 264–271 (2014).
- 535 22. Di Lorenzo, R. *et al.* Recommendations for motion correction of infant fNIRS  
536 data applicable to multiple data sets and acquisition systems. *Neuroimage* **200**,  
537 511–527 (2019).
- 538 23. Yamasaki, T. *et al.* Rapid maturation of voice and linguistic processing systems  
539 in preschool children: a near-infrared spectroscopic study. *Exp. Neurol.* **250**,  
540 313–320 (2013).
- 541 24. Mazzoni, A., Grove, R., Eapen, V., Lenroot, R. K. & Bruggemann, J. The  
542 promise of functional near-infrared spectroscopy in autism research: What do we  
543 know and where do we go? *Soc. Neurosci.* **14**, 505–518 (2019).
- 544 25. Zhang, F. & Roeyers, H. Exploring brain functions in autism spectrum disorder:  
545 A systematic review on functional near-infrared spectroscopy (fNIRS) studies.



- 546 *Int. J. Psychophysiol.* **137**, 41–53 (2019).
- 547 26. Keehn, B., Wagner, J. B., Tager-Flusberg, H. & Nelson, C. A. Functional  
548 connectivity in the first year of life in infants at-risk for autism: a preliminary near-  
549 infrared spectroscopy study. *Front. Hum. Neurosci.* **7**, 444 (2013).
- 550 27. Zhu, H., Fan, Y., Guo, H., Huang, D. & He, S. Reduced interhemispheric  
551 functional connectivity of children with autism spectrum disorder: evidence from  
552 functional near infrared spectroscopy studies. *Biomed. Opt. Express* **5**, 1262–  
553 1274 (2014).
- 554 28. Li, J. *et al.* Characterization of autism spectrum disorder with spontaneous  
555 hemodynamic activity. *Biomed. Opt. Express* **7**, 3871–3881 (2016).
- 556 29. Li, Y. & Yu, D. Weak network efficiency in young children with Autism Spectrum  
557 Disorder: Evidence from a functional near-infrared spectroscopy study. *Brain*  
558 *and Cognition* vol. 108 47–55 (2016).
- 559 30. Jia, H., Li, Y. & Yu, D. Attenuation of long-range temporal correlations of  
560 neuronal oscillations in young children with autism spectrum disorder.  
561 *Neuroimage Clin* **20**, 424–432 (2018).
- 562 31. Cao, W. *et al.* The Development of Brain Network in Males with Autism  
563 Spectrum Disorders from Childhood to Adolescence: Evidence from fNIRS  
564 Study. *Brain Sci* **11**, (2021).
- 565 32. Xu, M., Minagawa, Y., Kumazaki, H., Okada, K.-I. & Naoi, N. Prefrontal  
566 Responses to Odors in Individuals With Autism Spectrum Disorders: Functional  
567 NIRS Measurement Combined With a Fragrance Pulse Ejection System. *Front.*  
568 *Hum. Neurosci.* **14**, 523456 (2020).
- 569 33. Xiao, T. *et al.* Response inhibition impairment in high functioning autism and  
570 attention deficit hyperactivity disorder: evidence from near-infrared spectroscopy  
571 data. *PLoS One* **7**, e46569 (2012).
- 572 34. Lloyd-Fox, S. *et al.* Reduced neural sensitivity to social stimuli in infants at risk  
573 for autism. *Proc. Biol. Sci.* **280**, 20123026 (2013).
- 574 35. Braukmann, R. *et al.* Diminished socially selective neural processing in 5-month-  
575 old infants at high familial risk of autism. *Eur. J. Neurosci.* **47**, 720–728 (2018).
- 576 36. Lloyd-Fox, S. *et al.* Cortical responses before 6 months of life associate with  
577 later autism. *Eur. J. Neurosci.* **47**, 736–749 (2018).
- 578 37. Bhat, A. N., McDonald, N. M., Eilbott, J. E. & Pelphrey, K. A. Exploring cortical  
579 activation and connectivity in infants with and without familial risk for autism

- 580 during naturalistic social interactions: A preliminary study. *Infant Behav. Dev.* **57**,  
581 101337 (2019).
- 582 38. Iwanaga, R. *et al.* Usefulness of near-infrared spectroscopy to detect brain  
583 dysfunction in children with autism spectrum disorder when inferring the mental  
584 state of others. *Psychiatry Clin. Neurosci.* **67**, 203–209 (2013).
- 585 39. Zhu, B. & Godavarty, A. Functional connectivity in the brain in joint attention  
586 skills using near infrared spectroscopy and imaging. *Behav. Brain Res.* **250**, 28–  
587 31 (2013).
- 588 40. Zhu, H. *et al.* Atypical prefrontal cortical responses to joint/non-joint attention in  
589 children with autism spectrum disorder (ASD): A functional near-infrared  
590 spectroscopy study. *Biomed. Opt. Express* **6**, 690–701 (2015).
- 591 41. Tamura, R., Kitamura, H., Endo, T., Abe, R. & Someya, T. Decreased leftward  
592 bias of prefrontal activity in autism spectrum disorder revealed by functional  
593 near-infrared spectroscopy. *Psychiatry Res.* **203**, 237–240 (2012).
- 594 42. Su, W.-C. *et al.* Differences in cortical activation patterns during action  
595 observation, action execution, and interpersonal synchrony between children  
596 with or without autism spectrum disorder (ASD): An fNIRS pilot study. *PLoS One*  
597 **15**, e0240301 (2020).
- 598 43. Kita, Y. *et al.* Self-face recognition in children with autism spectrum disorders: a  
599 near-infrared spectroscopy study. *Brain Dev.* **33**, 494–503 (2011).
- 600 44. Nakadoi, Y. *et al.* Multi-channel near-infrared spectroscopy shows reduced  
601 activation in the prefrontal cortex during facial expression processing in  
602 pervasive developmental disorder. *Psychiatry Clin. Neurosci.* **66**, 26–33 (2012).
- 603 45. Fox, S. E., Wagner, J. B., Shrock, C. L., Tager-Flusberg, H. & Nelson, C. A.  
604 Neural processing of facial identity and emotion in infants at high-risk for autism  
605 spectrum disorders. *Front. Hum. Neurosci.* **7**, 89 (2013).
- 606 46. Mori, K. *et al.* Neuroimaging in autism spectrum disorders: 1H-MRS and NIRS  
607 study. *J. Med. Invest.* **62**, 29–36 (2015).
- 608 47. Minagawa-Kawai, Y. *et al.* Cerebral laterality for phonemic and prosodic cue  
609 decoding in children with autism. *Neuroreport* **20**, 1219–1224 (2009).
- 610 48. Funabiki, Y., Murai, T. & Toichi, M. Cortical activation during attention to sound  
611 in autism spectrum disorders. *Res. Dev. Disabil.* **33**, 518–524 (2012).
- 612 49. Edwards, L. A., Wagner, J. B., Tager-Flusberg, H. & Nelson, C. A. Differences in  
613 Neural Correlates of Speech Perception in 3 Month Olds at High and Low Risk

- 614 for Autism Spectrum Disorder. *J. Autism Dev. Disord.* **47**, 3125–3138 (2017).
- 615 50. Pecukonis, M., Perdue, K. L., Wong, J., Tager-Flusberg, H. & Nelson, C. A.  
616 Exploring the relation between brain response to speech at 6-months and  
617 language outcomes at 24-months in infants at high and low risk for autism  
618 spectrum disorder: A preliminary functional near-infrared spectroscopy study.  
619 *Dev. Cogn. Neurosci.* **47**, 100897 (2021).
- 620 51. Yasumura, A. *et al.* Age-related differences in frontal lobe function in children  
621 with ADHD. *Brain Dev.* **41**, 577–586 (2019).
- 622 52. Chou, P.-H., Huang, C.-J. & Sun, C.-W. The Potential Role of Functional Near-  
623 Infrared Spectroscopy as Clinical Biomarkers in Schizophrenia. *Curr. Pharm.*  
624 *Des.* **26**, 201–217 (2020).
- 625 53. Husain, S. F. *et al.* Validating a functional near-infrared spectroscopy diagnostic  
626 paradigm for Major Depressive Disorder. *Sci. Rep.* **10**, 9740 (2020).
- 627 54. Xu, L. *et al.* Characterizing autism spectrum disorder by deep learning  
628 spontaneous brain activity from functional near-infrared spectroscopy. *J.*  
629 *Neurosci. Methods* **331**, 108538 (2020).
- 630 55. Yang, D., Hong, K.-S., Yoo, S.-H. & Kim, C.-S. Evaluation of Neural  
631 Degeneration Biomarkers in the Prefrontal Cortex for Early Identification of  
632 Patients With Mild Cognitive Impairment: An fNIRS Study. *Front. Hum. Neurosci.*  
633 **13**, 317 (2019).
- 634 56. Yanagisawa, K., Nakamura, N., Tsunashima, H. & Narita, N. Proposal of  
635 auxiliary diagnosis index for autism spectrum disorder using near-infrared  
636 spectroscopy. *Neurophotonics* **3**, 031413 (2016).
- 637 57. Xu, L. *et al.* Identification of autism spectrum disorder based on short-term  
638 spontaneous hemodynamic fluctuations using deep learning in a multi-layer  
639 neural network. *Clin. Neurophysiol.* **132**, 457–468 (2021).
- 640 58. Durand, S. *et al.* NMDA receptor regulation prevents regression of visual cortical  
641 function in the absence of *Mecp2*. *Neuron* **76**, 1078–1090 (2012).
- 642 59. de Freitas Dotto, P. *et al.* Sweep visually evoked potentials and visual findings in  
643 children with West syndrome. *Eur. J. Paediatr. Neurol.* **18**, 201–210 (2014).
- 644 60. Begenisic, T., Sansevero, G., Baroncelli, L., Cioni, G. & Sale, A. Early  
645 environmental therapy rescues brain development in a mouse model of Down  
646 syndrome. *Neurobiol. Dis.* **82**, 409–419 (2015).
- 647 61. Boggio, E. M. *et al.* Visual impairment in FOXP1-mutated individuals and mice.

- 648        *Neuroscience* **324**, 496–508 (2016).
- 649    62. Mazziotti, R. *et al.* Searching for biomarkers of CDKL5 disorder: early-onset  
650        visual impairment in CDKL5 mutant mice. *Hum. Mol. Genet.* **26**, 2290–2298  
651        (2017).
- 652    63. Mazziotti, R. *et al.* Novel translational phenotypes and biomarkers for creatine  
653        transporter deficiency. *Brain Commun* **2**, fcaa089 (2020).
- 654    64. LeBlanc, J. J. *et al.* Visual evoked potentials detect cortical processing deficits in  
655        Rett syndrome. *Ann. Neurol.* **78**, 775–786 (2015).
- 656    65. Keehn, B., Westerfield, M. & Townsend, J. Brief Report: Cross-Modal Capture:  
657        Preliminary Evidence of Inefficient Filtering in Children with Autism Spectrum  
658        Disorder. *J. Autism Dev. Disord.* **49**, 385–390 (2019).
- 659    66. Little, J.-A. Vision in children with autism spectrum disorder: a critical review.  
660        *Clin. Exp. Optom.* **101**, 504–513 (2018).
- 661    67. Seymour, R. A., Rippon, G., Gooding-Williams, G., Schoffelen, J. M. & Kessler,  
662        K. Dysregulated oscillatory connectivity in the visual system in autism spectrum  
663        disorder. *Brain* **142**, 3294–3305 (2019).
- 664    68. Baron-Cohen, S., Wheelwright, S., Skinner, R., Martin, J. & Clubley, E. The  
665        autism-spectrum quotient (AQ): evidence from Asperger syndrome/high-  
666        functioning autism, males and females, scientists and mathematicians. *J. Autism*  
667        *Dev. Disord.* **31**, 5–17 (2001).
- 668    69. Auyeung, B., Baron-Cohen, S., Wheelwright, S. & Allison, C. The Autism  
669        Spectrum Quotient: Children's Version (AQ-Child). *J. Autism Dev. Disord.* **38**,  
670        1230–1240 (2008).
- 671    70. Tachtsidis, I. & Scholkmann, F. False positives and false negatives in functional  
672        near-infrared spectroscopy: issues, challenges, and the way forward.  
673        *Neurophotonics* **3**, 031405 (2016).
- 674    71. Chen, L.-C., Sandmann, P., Thorne, J. D., Herrmann, C. S. & Debener, S.  
675        Association of Concurrent fNIRS and EEG Signatures in Response to Auditory  
676        and Visual Stimuli. *Brain Topogr.* **28**, 710–725 (2015).
- 677    72. Ward, L. M., Aitchison, R. T., Tawse, M., Simmers, A. J. & Shahani, U. Reduced  
678        Haemodynamic Response in the Ageing Visual Cortex Measured by Absolute  
679        fNIRS. *PLoS One* **10**, e0125012 (2015).
- 680    73. Simmons, D. R. *et al.* Vision in autism spectrum disorders. *Vision Res.* **49**,  
681        2705–2739 (2009).

- 682 74. Park, W. J., Schauder, K. B., Zhang, R., Bennetto, L. & Tadin, D. High internal  
683 noise and poor external noise filtering characterize perception in autism  
684 spectrum disorder. *Sci. Rep.* **7**, 17584 (2017).
- 685 75. Noel, J.-P., Lakshminarasimhan, K. J., Park, H. & Angelaki, D. E. Increased  
686 variability but intact integration during visual navigation in Autism Spectrum  
687 Disorder. *Proc. Natl. Acad. Sci. U. S. A.* **117**, 11158–11166 (2020).
- 688 76. Noel, J.-P., Zhang, L.-Q., Stocker, A. A. & Angelaki, D. E. Individuals with autism  
689 spectrum disorder have altered visual encoding capacity. *PLoS Biol.* **19**,  
690 e3001215 (2021).
- 691 77. Turi, M., Burr, D. C. & Binda, P. Pupillometry reveals perceptual differences that  
692 are tightly linked to autistic traits in typical adults. *Elife* **7**, (2018).
- 693 78. Tortelli, C., Turi, M., Burr, D. C. & Binda, P. Objective pupillometry shows that  
694 perceptual styles covary with autistic-like personality traits. *Elife* **10**, (2021).
- 695 79. Hallen, R. V. der *et al.* Global processing takes time: A meta-analysis on local–  
696 global visual processing in ASD. *Psychological Bulletin* vol. 141 549–573 (2015).
- 697 80. Ouellette, J. *et al.* Vascular contributions to 16p11.2 deletion autism syndrome  
698 modeled in mice. *Nat. Neurosci.* **23**, 1090–1101 (2020).
- 699 81. Kozberg, M. & Hillman, E. Neurovascular coupling and energy metabolism in the  
700 developing brain. *Prog. Brain Res.* **225**, 213–242 (2016).
- 701 82. Broadbent, J., Galic, I. & Stokes, M. A. Validation of Autism Spectrum Quotient  
702 Adult Version in an Australian Sample. *Autism Research and Treatment* vol.  
703 2013 1–7 (2013).
- 704 83. Lundqvist, L.-O. & Lindner, H. Is the Autism-Spectrum Quotient a Valid Measure  
705 of Traits Associated with the Autism Spectrum? A Rasch Validation in Adults  
706 with and Without Autism Spectrum Disorders. *J. Autism Dev. Disord.* **47**, 2080–  
707 2091 (2017).
- 708 84. Wouters, S. G. M. & Spek, A. A. The use of the Autism-spectrum Quotient in  
709 differentiating high-functioning adults with autism, adults with schizophrenia and  
710 a neurotypical adult control group. *Research in Autism Spectrum Disorders* vol.  
711 5 1169–1175 (2011).
- 712 85. Leekam, S. R., Nieto, C., Libby, S. J., Wing, L. & Gould, J. Describing the  
713 sensory abnormalities of children and adults with autism. *J. Autism Dev. Disord.*  
714 **37**, 894–910 (2007).
- 715 86. Scharre, J. E. & Creedon, M. P. Assessment of visual function in autistic

- 716 children. *Optom. Vis. Sci.* **69**, 433–439 (1992).
- 717 87. Apicella, F., Costanzo, V. & Purpura, G. Are early visual behavior impairments  
718 involved in the onset of autism spectrum disorders? Insights for early diagnosis  
719 and intervention. *European Journal of Pediatrics* vol. 179 225–234 (2020).
- 720 88. Kern, J. K. *et al.* Sensory correlations in autism. *Autism* vol. 11 123–134 (2007).
- 721 89. Jones, W. & Klin, A. Attention to eyes is present but in decline in 2-6-month-old  
722 infants later diagnosed with autism. *Nature* **504**, 427–431 (2013).
- 723 90. McPartland, J. C. *et al.* Looking Back at the Next 40 Years of ASD Neuroscience  
724 Research. *J. Autism Dev. Disord.* (2021) doi:10.1007/s10803-021-05095-5.
- 725 91. Baird, G., Cass, H. & Slonims, V. Diagnosis of autism. *BMJ* **327**, 488–493  
726 (2003).
- 727 92. Zwaigenbaum, L. *et al.* Stability of diagnostic assessment for autism spectrum  
728 disorder between 18 and 36 months in a high-risk cohort. *Autism Res.* **9**, 790–  
729 800 (2016).
- 730 93. Emerson, R. W. *et al.* Functional neuroimaging of high-risk 6-month-old infants  
731 predicts a diagnosis of autism at 24 months of age. *Sci. Transl. Med.* **9**, (2017).
- 732 94. Hazlett, H. C. *et al.* Early brain development in infants at high risk for autism  
733 spectrum disorder. *Nature* **542**, 348–351 (2017).
- 734 95. Ruta, L., Mazzone, D., Mazzone, L., Wheelwright, S. & Baron-Cohen, S. The  
735 Autism-Spectrum Quotient--Italian version: a cross-cultural confirmation of the  
736 broader autism phenotype. *J. Autism Dev. Disord.* **42**, 625–633 (2012).
- 737 96. Vrana, A., Meier, M. L., Hotz-Boendermaker, S., Humphreys, B. K. &  
738 Scholkman, F. Cortical Sensorimotor Processing of Painful Pressure in Patients  
739 with Chronic Lower Back Pain-An Optical Neuroimaging Study using fNIRS.  
740 *Front. Hum. Neurosci.* **10**, 578 (2016).
- 741 97. Zimeo Morais, G. A., Balardin, J. B. & Sato, J. R. fNIRS Optodes' Location  
742 Decider (fOLD): a toolbox for probe arrangement guided by brain regions-of-  
743 interest. *Sci. Rep.* **8**, 3341 (2018).
- 744 98. Peirce, J. *et al.* PsychoPy2: Experiments in behavior made easy. *Behav. Res.*  
745 *Methods* **51**, 195–203 (2019).
- 746 99. Gollapudi, S. OpenCV with Python. *Learn Computer Vision Using OpenCV* 31–  
747 50 (2019) doi:10.1007/978-1-4842-4261-2\_2.
- 748 100. Vallat, R. Pingouin: statistics in Python. *Journal of Open Source Software* vol.  
749 3 1026 (2018).

750 101. Hunter, J. D. Matplotlib: A 2D Graphics Environment. *Computing in Science &*  
751 *Engineering* vol. 9 90–95 (2007).

752

753

754 **Acknowledgements:** This work was supported by a Telethon grant from GP19177  
755 to LB, and a grant from University of Pisa (PRA-2020-50) to RB.

756

757 **Author contribution:** RB, GC and LB conceived the study. RM, ES, EC, VM, RR  
758 and LB designed the experiments. RM, ES and LB carried out the research. RM, ES  
759 and LB analyzed the data. LB wrote the manuscript. All authors were involved in the  
760 revision of the draft manuscript and have agreed to the final content.

761

762 **Conflict of Interest:** The authors declare no competing financial interests.

763

764

## 765 **Figure legends**

766 **Fig.1: Visual stimulation and experimental paradigm. A:** Representative frame of  
767 baseline grey screen (upper row, stimulus ‘off’) and reversing checkerboard (lower  
768 row, stimulus ‘on’) for RS condition. The small black square indicates the fixation  
769 point. **B:** Representative frame of low-contrast (20%) grey-scale baseline animated  
770 cartoon (upper row, stimulus ‘off’) and blended checkerboard-cartoon (lower row,  
771 stimulus ‘on’) for CF and CC conditions. **C:** Representative HDR in the occipital  
772 cortex during the stimulus ‘off’ (upper row) and stimulus ‘on’ activation phase (lower  
773 row) according to the output of nirsLAB software. The Look Up table is reported  
774 under the images. **D:** Experimental protocol showing that the cycles of visual  
775 stimulation were structured in blocks of 40 trials (20 trials with the reversing  
776 checkerboard and 20 trials with the ‘mock’ stimulus) for a total duration of 10  
777 minutes.

778

779 **Fig. 2: HDR was reliably detected in adults using both RS and blended RS-**  
780 **animated cartoons.** For all panels, values in the y-axis are multiplied for  $10^4$ . **A:**  
781 On the left, the average time course for THb (green line), OHb (red line) and DHb  
782 (blue line) in response to the RS are shown. The three plots on the right depict the

783 average peak response to the stimulus (S) vs. the blank (B) across all the adult  
784 subjects. The stimulus-driven signal was significantly different from the blank for all  
785 the conditions (t-test,  $p < 0.001$  for all comparisons). **B:** Same plots as above for the  
786 CF condition. On the left, the average time course of the evoked HDR is depicted.  
787 On the right, the graphs showed that the HDR amplitude was significantly higher in  
788 response to S with respect to B for THb, OHb and DHb (t-test,  $p < 0.001$  for all  
789 comparisons). **C:** CC condition. Also in this case the S elicited significantly higher  
790 responses for THb, OHb and DHb with respect to the B (t-test,  $p < 0.001$  for all  
791 comparisons). **D:** Comparison among different visual stimulations (RS: Radial  
792 Stimulus, CF: fixed cartoon, CC: chosen cartoon) shows no differences in evoked  
793 amplitudes for THb, whereas a significant difference was detected between RS and  
794 CC for OHb (One-way RM ANOVA,  $p < 0.01$ , post hoc BH-FDR, RS vs. CC  $p < 0.01$ )  
795 and a more complex pattern of differences emerged for DHb (One-way RM ANOVA,  
796  $p < 0.001$ , post hoc BH-FDR, RS vs. CF  $p < 0.01$ , RS vs. CC  $p < 0.001$ , CF vs CC  $p$   
797  $< 0.05$ ). **E:** No differences of evoked responses were detected with different contrast  
798 levels of the baseline movie (L: low, M: medium, H: high). For statistical metrics and  
799 details, refer to table S1. Data are shown as average  $\pm$  s.e.m. \*  $p < 0.05$ ; \*\*  $p < 0.01$ ;  
800 \*\*\*  $p < 0.001$ .

801

802 **Fig. 3: HDR signal was reliably detected in children using blended RS-animated**  
803 **cartoons with low and high contrast.** For all panels, values in the y-axis are  
804 multiplied for  $10^4$ . **A:** On the left, the average time course for THb (green line), OHb  
805 (red line) and DHb (blue line) in response to low-contrast (20%) blended RS-  
806 animated cartoons is shown. On the right, the graphs represent the average  
807 amplitude of the evoked HDR following the stimulus (S) and the blank (B). A  
808 significantly different response to S with respect to the B was detectable for all  
809 metrics (t-test,  $p < 0.001$  for all comparisons). **B:** The average time course of the  
810 HDR to high-contrast (80%) blended RS-animated cartoons is shown. Here, the  
811 baseline cartoon is the same as the experiment described in panel A, but a different  
812 part of the movie was used. THb, OHb and DHb showed a significantly higher  
813 deflection to the S with respect to the B in this condition as well (t-test,  $p < 0.001$  for  
814 all comparisons). **C:** On the left, the average time course of HDR following the  
815 second low-contrast blended RS-animated cartoon selected by the subject. On the  
816 right, the analysis of peak amplitudes revealed significantly higher responses during



817 S compared to B for THb, OHb and DHb (t-test,  $p < 0.001$  for all comparisons). **D:**  
818 Comparison among different contrast levels of the baseline cartoon revealed no  
819 differences in the amplitude of HDR. **E:** Response amplitudes for low-contrast  
820 blended RS-animated cartoons in adults and children. More specifically, we  
821 compared the response to CF condition of adults with L1 condition for children. The  
822 average amplitude of HDR was significantly higher in children (t-test,  $p < 0.001$  for  
823 THb,  $p < 0.05$  for OHb,  $p < 0.01$  for DHb). For statistical metrics and details, refer to  
824 table S1. Data are shown as average  $\pm$  s.e.m. \*  $p < 0.05$ ; \*\*  $p < 0.01$ ; \*\*\*  $p < 0.001$ .

825

826 **Fig. 4: Correlation between HDR and AQ scores.** For all panels, values in the x-  
827 axis are multiplied for  $10^4$ . The  $\rho$  (rho) index in each plot indicates the Spearman  
828 correlation value. **A-C:** Correlation between HDR and AQ scores in adults, for  
829 amplitudes obtained using RS (**A**), CF (**B**), and CC (**C**). No significant correlations  
830 were detected for adult participants. **D-E:** Correlation between HDR and AQ scores  
831 in children, for amplitudes obtained using high (**D**), and low (**E**) contrast baseline  
832 cartoons. A significant correlation was found between THb and AQ scores for both  
833 high- and low-contrast blended stimuli ( $p < 0.05$  for both cases). Circles are  
834 individual values, lines represent the linear regression model fit and shaded regions  
835 are the 95% CI.

836

837 **Fig. 5: Correlation between HDR and AQ subscales in children.** For all panels,  
838 values in the x-axis are multiplied for  $\times 10^4$ . The  $\rho$  (rho) index in each plot indicates  
839 the Spearman correlation value. **A-B:** Correlations between HDR and AQ Social  
840 Skills (AQ\_S) subscale. A significant correlation between THb and AQ\_S was  
841 detected using both high- (A) and low-contrast blended stimuli (B;  $p < 0.05$  for both  
842 cases). In addition, OHb recorded in response to the low-contrast blended RS-  
843 cartoon was significantly correlated with AQ\_S (B;  $p < 0.05$ ). **C-D:** Correlations  
844 between HDR and AQ Communication (AQ\_C) subscale. THb amplitude in response  
845 to the high-contrast blended RS-cartoon was significantly correlated with AQ\_C ( $p <$   
846  $0.05$ ). Circles are individual values, lines represent the linear regression model fit  
847 and shaded regions are the 95% CI.

848

849 **Table 1:** Demographic characteristics of adult subjects. Age (years), gender, head  
850 circumference (head, cm), cap size (cm), total AQ score (AQ), AQ subscale scores

851 (AQ\_S, AQ\_C, AQ\_A, AQ\_D, AQ\_I) and the movies used for visual stimulation (CF  
852 and CC according to the experimental protocol) are listed for each participant. For  
853 movies, production company, release date and episode title are indicated as well.

854

855 **Table 2:** Demographic characteristics of children. Age (years), gender, head  
856 circumference (head, cm), cap size (cm), total AQ score (AQ), AQ subscale scores  
857 (AQ\_S, AQ\_C, AQ\_A, AQ\_D, AQ\_I) and the movies used for visual stimulation (C1  
858 and C2 according to the experimental protocol) are listed for each participant. For  
859 movies, production company, release date and episode title are indicated as well.

860

Fig 1

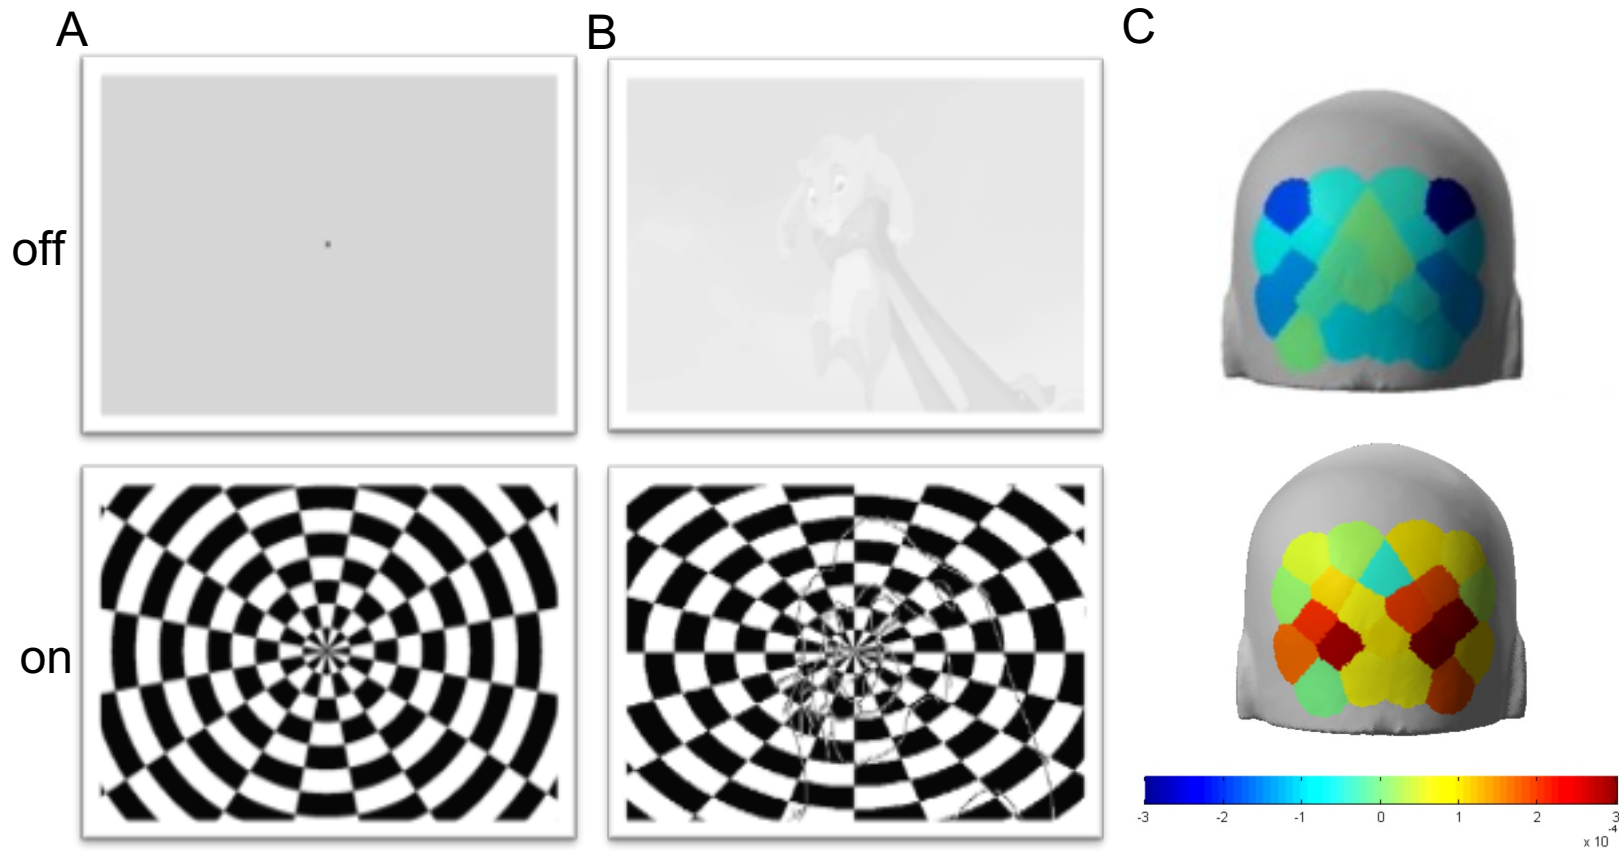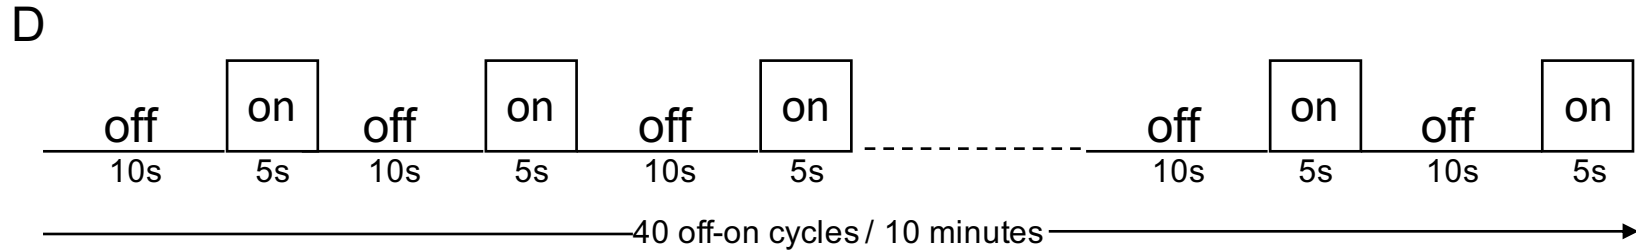

Fig 2

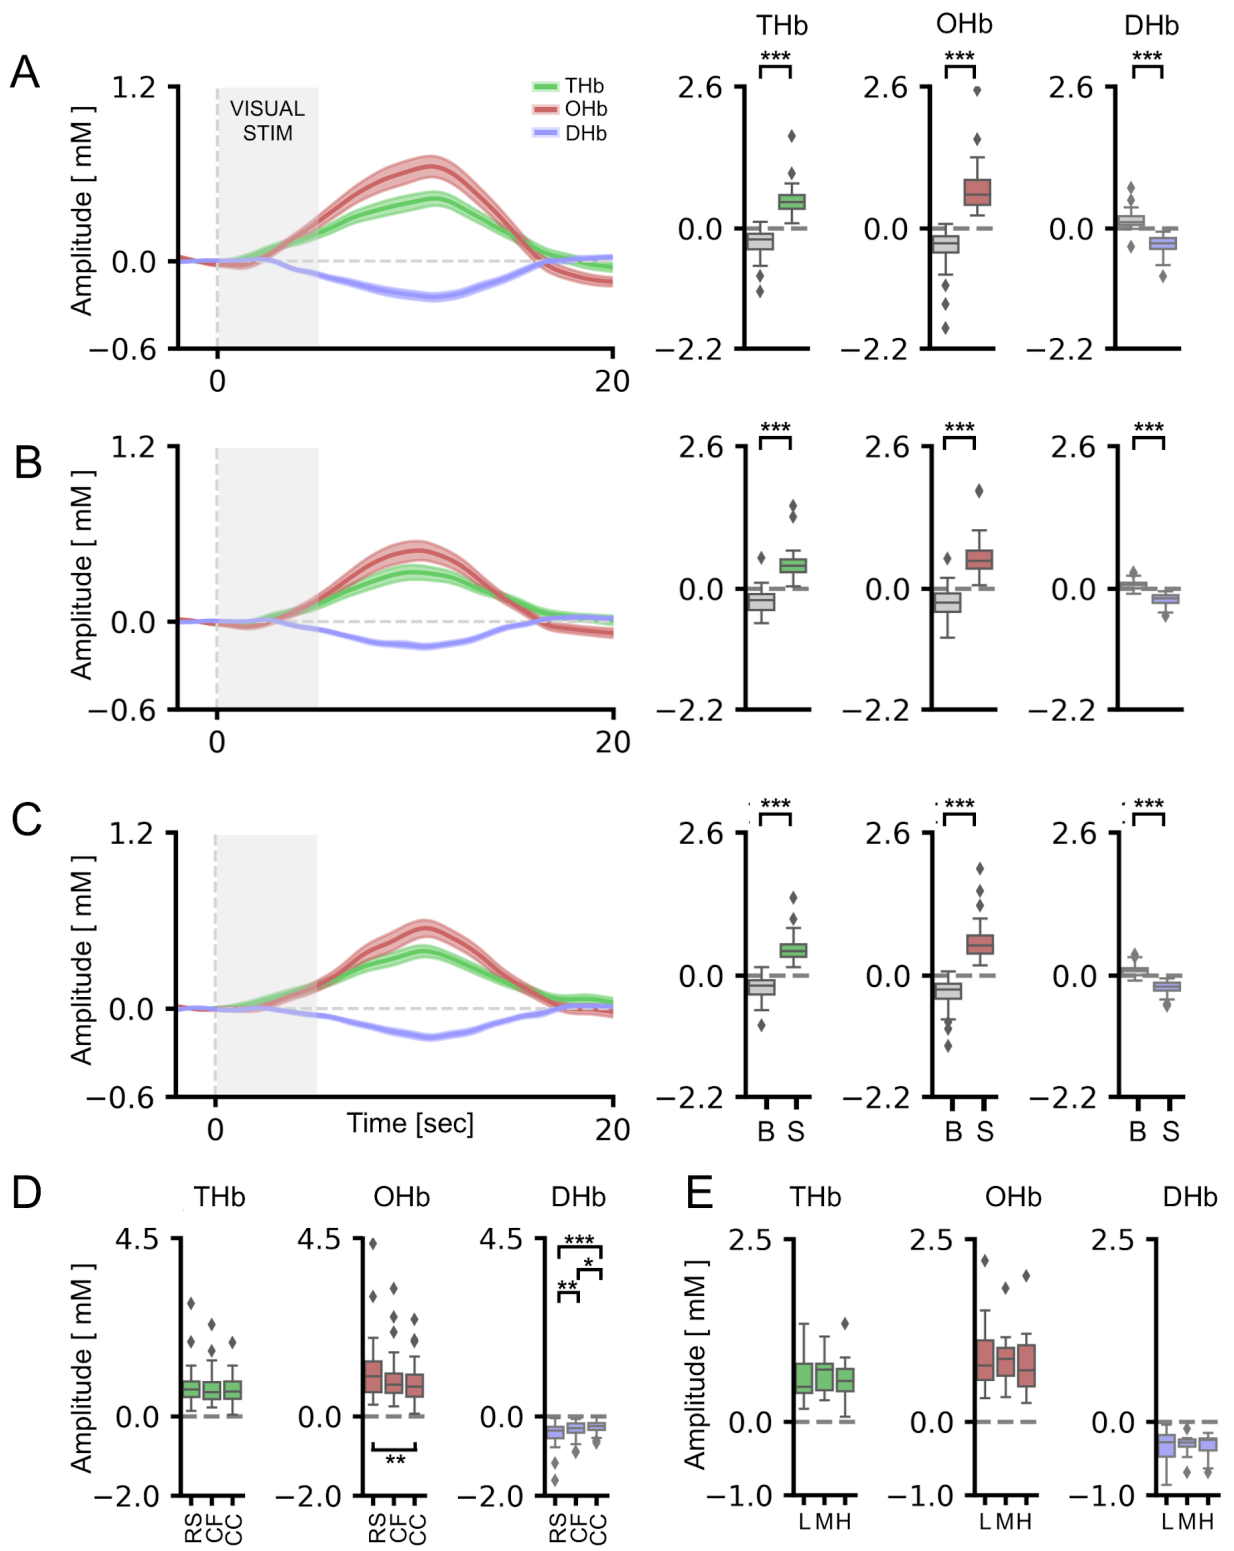

Fig 3

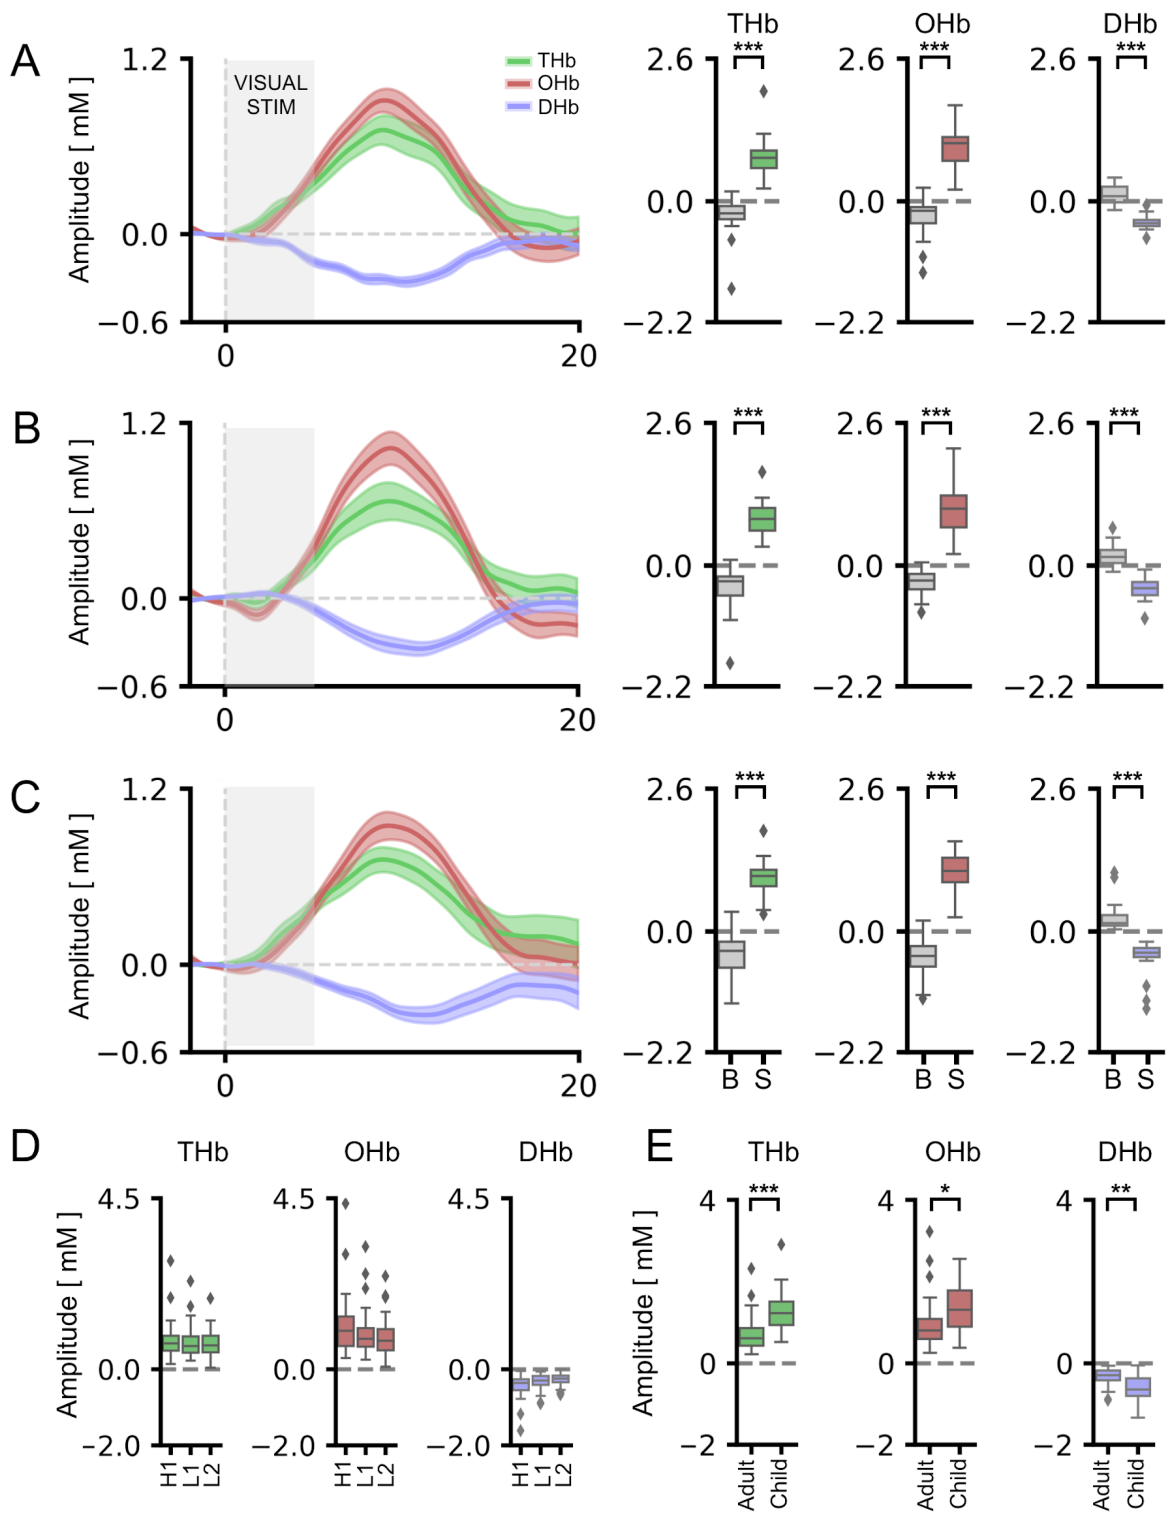

Fig 4

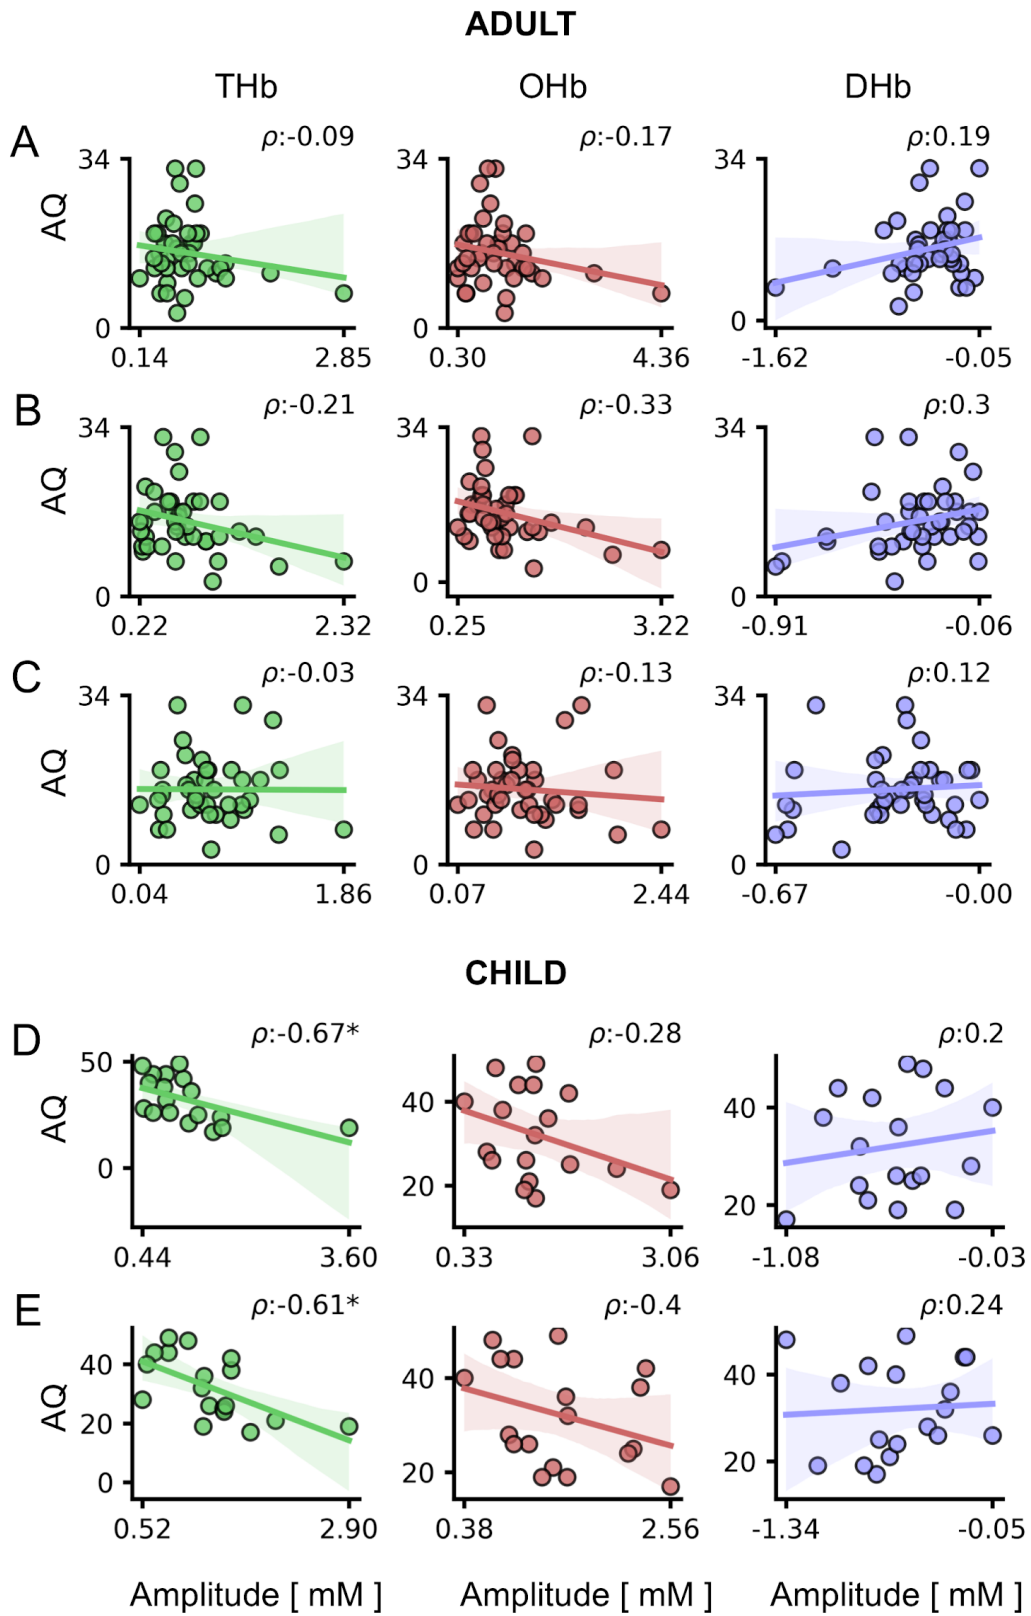

Fig 5

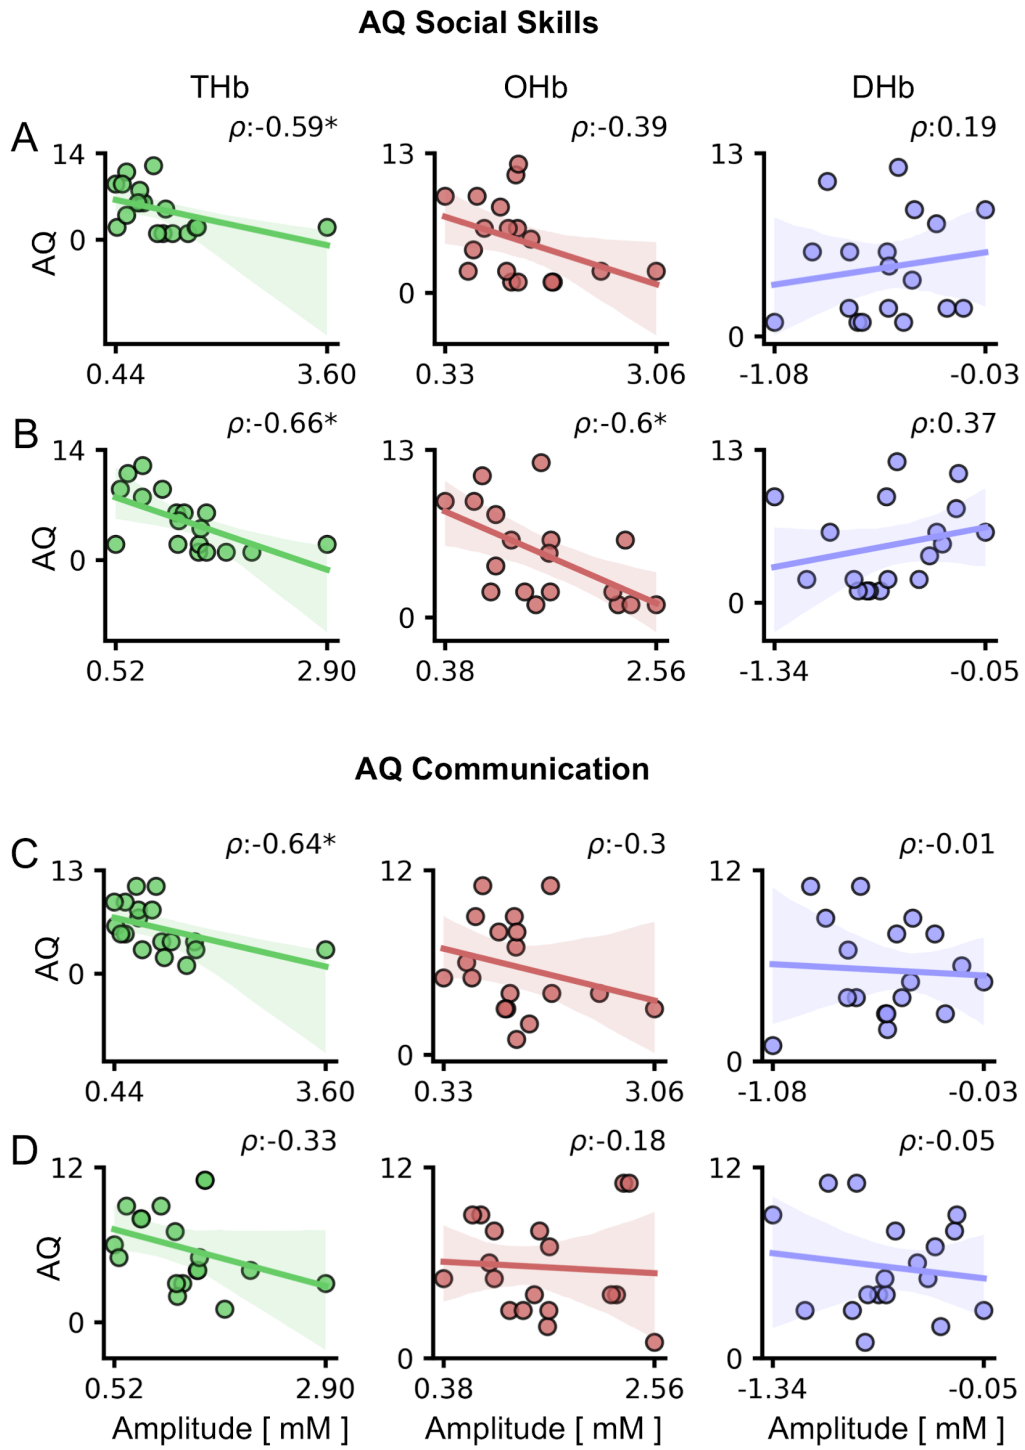

| ID  | Age | Gender | Head | Cap size | AQ | AQ_S | AQ_C | AQ_A | AQ_D | AQ_I | CF                                                                                                         | CC                                                                      |
|-----|-----|--------|------|----------|----|------|------|------|------|------|------------------------------------------------------------------------------------------------------------|-------------------------------------------------------------------------|
| A1  | 29  | F      | 57   | 56       | 11 | 0    | 1    | 7    | 1    | 2    | The Lion King<br>Walt Disney Pictures,1994                                                                 | The Sword in the Stone<br>Walt Disney Productions,1963                  |
| A2  | 36  | F      | 56   | 56       | 17 | 0    | 0    | 6    | 9    | 2    | The Powerpuff Girls<br>special episode "Twas the Fight Before Christmas",<br>Cartoon Network Studios, 2003 | The Aristocats<br>Walt Disney Productions,1970                          |
| A3  | 35  | M      | 57   | 56       | 17 | 3    | 3    | 5    | 0    | 6    | Kung Fu Panda<br>DreamWorks Animation, 2008                                                                | Aladdin<br>Walt Disney Pictures,1992                                    |
| A4  | 28  | F      | 57   | 56       | 3  | 0    | 0    | 1    | 1    | 1    | Peppa Pig<br>"Hide-and-seek", "Fly the kite", "Polly parrot" episodes,<br>Entertainment One, 2004          | The Simpsons<br>S29E02 "Springfield Splendor",<br>20th Television, 2017 |
| A5  | 25  | F      | 57   | 56       | 19 | 4    | 1    | 7    | 6    | 1    | The Lion King<br>Walt Disney Pictures,1994                                                                 | 101 Dalmatians<br>Walt Disney Productions,1961                          |
| A6  | 35  | F      | 57   | 56       | 15 | 4    | 2    | 4    | 5    | 0    | The Powerpuff Girls<br>special episode "Twas the Fight Before Christmas",<br>Cartoon Network Studios, 2003 | The Simpsons<br>S29E02 "Springfield Splendor",<br>20th Television, 2017 |
| A7  | 29  | F      | 57   | 56       | 11 | 0    | 2    | 5    | 3    | 1    | Peppa Pig<br>"Hide-and-seek", "Fly the kite", "Polly parrot" episodes,<br>Entertainment One, 2004          | 101 Dalmatians<br>Walt Disney Productions,1961                          |
| A8  | 30  | F      | 56   | 56       | 13 | 0    | 2    | 4    | 5    | 2    | Kung Fu Panda<br>DreamWorks Animation, 2008                                                                | Wall-E<br>Disney-Pixar, 2008                                            |
| A9  | 29  | F      | 59   | 56       | 7  | 1    | 1    | 3    | 2    | 0    | The Lion King<br>Walt Disney Pictures,1994                                                                 | The Sword in the Stone<br>Walt Disney Productions,1963                  |
| A10 | 29  | M      | 58   | 56       | 12 | 1    | 1    | 5    | 4    | 1    | The Powerpuff Girls<br>special episode "Twas the Fight Before Christmas",<br>Cartoon Network Studios, 2003 | Aladdin<br>Walt Disney Pictures,1992                                    |
| A11 | 27  | M      | 56.5 | 56       | 17 | 2    | 3    | 5    | 4    | 3    | Peppa Pig<br>"Hide-and-seek", "Fly the kite", "Polly parrot" episodes,<br>Entertainment One, 2004          | 101 Dalmatians<br>Walt Disney Productions,1961                          |
| A12 | 30  | F      | 56   | 56       | 9  | 1    | 2    | 2    | 3    | 1    | Kung Fu Panda<br>DreamWorks Animation, 2008                                                                | Inside out<br>Disney-Pixar, 2015                                        |
| A13 | 29  | M      | 57   | 56       | 14 | 1    | 3    | 6    | 2    | 2    | The Lion King<br>Walt Disney Pictures,1994                                                                 | Wall-E<br>Disney-Pixar, 2008                                            |
| A14 | 36  | M      | 58.5 | 56       | 19 | 2    | 2    | 5    | 7    | 3    | The Powerpuff Girls<br>special episode "Twas the Fight Before Christmas",<br>Cartoon Network Studios, 2003 | 101 Dalmatians<br>Walt Disney Productions,1961                          |
| A15 | 36  | M      | 57   | 56       | 16 | 4    | 1    | 4    | 5    | 2    | Peppa Pig<br>"Hide-and-seek", "Fly the kite", "Polly parrot" episodes,<br>Entertainment One, 2004          | Aladdin<br>Walt Disney Pictures,1992                                    |
| A16 | 29  | F      | 54   | 56       | 22 | 1    | 3    | 9    | 7    | 2    | Kung Fu Panda<br>DreamWorks Animation, 2008                                                                | The Rescuers<br>Walt Disney Productions,1977                            |
| A17 | 28  | F      | 58.5 | 56       | 7  | 1    | 0    | 2    | 1    | 3    | The Lion King<br>Walt Disney Pictures,1994                                                                 | 101 Dalmatians<br>Walt Disney Productions,1961                          |
| A18 | 29  | F      | 55   | 56       | 12 | 0    | 1    | 5    | 5    | 1    | The Powerpuff Girls<br>special episode "Twas the Fight Before Christmas",<br>Cartoon Network Studios, 2003 | Peter Pan<br>Walt Disney Productions,1953                               |
| A19 | 34  | M      | 60   | 56       | 19 | 6    | 2    | 5    | 5    | 1    | Peppa Pig<br>"Hide-and-seek", "Fly the kite", "Polly parrot" episodes,<br>Entertainment One, 2004          | SpongeBob<br>S12E01 "FarmerBob",<br>Nickelodeon Animation Studio, 2018  |
| A20 | 26  | M      | 58   | 56       | 10 | 3    | 0    | 5    | 2    | 0    | Kung Fu Panda<br>DreamWorks Animation, 2008                                                                | Inside out<br>Disney-Pixar, 2015                                        |



|     |    |   |      |    |    |    |   |   |    |   |                                                                                                            |                                                                                        |
|-----|----|---|------|----|----|----|---|---|----|---|------------------------------------------------------------------------------------------------------------|----------------------------------------------------------------------------------------|
| A21 | 36 | F | 56   | 56 | 15 | 1  | 2 | 2 | 7  | 3 | The Lion King<br>Walt Disney Pictures,1994                                                                 | Inside out<br>Disney-Pixar, 2015                                                       |
| A22 | 30 | M | 60.5 | 56 | 19 | 1  | 2 | 6 | 4  | 6 | The Lion King<br>Walt Disney Pictures,1994                                                                 | The Sword in the Stone<br>Walt Disney Productions,1963                                 |
| A23 | 26 | F | 56   | 56 | 12 | 0  | 1 | 5 | 6  | 0 | The Powerpuff Girls<br>special episode "Twas the Fight Before Christmas",<br>Cartoon Network Studios, 2003 | Wall-E<br>Disney-Pixar, 2008                                                           |
| A24 | 32 | M | 60.5 | 56 | 7  | 0  | 1 | 5 | 0  | 1 | Kung Fu Panda<br>DreamWorks Animation, 2008                                                                | Aladdin<br>Walt Disney Pictures,1992                                                   |
| A25 | 34 | F | 56   | 56 | 10 | 1  | 1 | 4 | 2  | 2 | The Lion King<br>Walt Disney Pictures1994                                                                  | Beauty and the Beast<br>Walt Disney Pictures,1994                                      |
| A26 | 29 | F | 57   | 56 | 32 | 6  | 5 | 8 | 9  | 4 | The Powerpuff Girls<br>special episode "Twas the Fight Before Christmas",<br>Cartoon Network Studios, 2003 | The Aristocats<br>Walt Disney Productions,1970                                         |
| A27 | 31 | M | 59   | 56 | 32 | 10 | 6 | 6 | 2  | 8 | Kung Fu Panda<br>DreamWorks Animation, 2008                                                                | The Simpsons<br>S29E02 "Springfield Splendor",<br>20th Television, 2017                |
| A28 | 39 | F | 57   | 56 | 21 | 2  | 4 | 4 | 8  | 3 | Peppa Pig<br>"Hide-and-seek", "Fly the kite", "Polly parrot" episodes,<br>Entertainment One, 2004          | Lady Oscar,<br>"A Funeral Bell Tolls in the Twilight" episode,<br>Discotek Media, 1980 |
| A29 | 29 | M | 57   | 56 | 6  | 0  | 0 | 2 | 2  | 2 | The Lion King<br>Walt Disney Pictures,1994                                                                 | The Simpsons<br>S29E02 "Springfield Splendor",<br>20th Television, 2017                |
| A30 | 29 | M | 57   | 56 | 17 | 3  | 2 | 5 | 6  | 1 | The Powerpuff Girls<br>special episode "Twas the Fight Before Christmas",<br>Cartoon Network Studios, 2003 | The Sword in the Stone<br>Walt Disney Productions,1963                                 |
| A31 | 36 | M | 59.5 | 56 | 12 | 0  | 0 | 6 | 4  | 2 | Peppa Pig<br>"Hide-and-seek", "Fly the kite", "Polly parrot" episodes,<br>Entertainment One, 2004          | The Sword in the Stone<br>Walt Disney Productions,1963                                 |
| A32 | 27 | M | 59   | 56 | 12 | 1  | 2 | 5 | 2  | 2 | The Powerpuff Girls<br>special episode "Twas the Fight Before Christmas",<br>Cartoon Network Studios, 2003 | The Aristocats<br>Walt Disney Productions,1970                                         |
| A33 | 40 | M | 57   | 56 | 13 | 2  | 3 | 1 | 6  | 1 | Peppa Pig<br>"Hide-and-seek", "Fly the kite", "Polly parrot" episodes,<br>Entertainment One, 2004          | The Simpsons<br>S29E02 "Springfield Splendor",<br>20th Television, 2017                |
| A34 | 31 | F | 55   | 56 | 15 | 1  | 1 | 4 | 4  | 5 | Kung Fu Panda<br>DreamWorks Animation, 2008                                                                | The Sword in the Stone<br>Walt Disney Productions,1963                                 |
| A35 | 27 | M | 56.5 | 56 | 19 | 6  | 2 | 4 | 7  | 0 | The Lion King<br>Walt Disney Pictures,1994                                                                 | Frozen<br>Walt Disney Pictures, 2013                                                   |
| A36 | 30 | M | 58   | 56 | 14 | 5  | 1 | 3 | 4  | 1 | The Powerpuff Girls<br>special episode "Twas the Fight Before Christmas",<br>Cartoon Network Studios, 2003 | Wall-E<br>Disney-Pixar, 2008                                                           |
| A37 | 25 | M | 58   | 56 | 29 | 6  | 8 | 6 | 7  | 2 | Peppa Pig<br>"Hide-and-seek", "Fly the kite", "Polly parrot" episodes,<br>Entertainment One, 2004          | Wall-E<br>Disney-Pixar, 2008                                                           |
| A38 | 31 | M | 57.5 | 56 | 10 | 0  | 1 | 5 | 3  | 1 | Kung Fu Panda<br>DreamWorks Animation, 2008                                                                | Inside out<br>Disney-Pixar, 2015                                                       |
| A39 | 38 | M | 57.5 | 56 | 25 | 2  | 4 | 6 | 8  | 5 | The Lion King<br>Walt Disney Pictures,1994                                                                 | The Sword in the Stone<br>Walt Disney Productions,1963                                 |
| A40 | 33 | F | 57.5 | 56 | 13 | 0  | 0 | 3 | 10 | 0 | The Powerpuff Girls<br>special episode "Twas the Fight Before Christmas",<br>Cartoon Network Studios, 2003 | Beauty and the Beast<br>Walt Disney Pictures,1994                                      |

| ID  | Age | Gender | Head | Cap size | AQ   | AQ-S | AQ_C | AQ_A | AQ_D | AQ_I | C1 (L1 and H1)                                                                                                         | C2 (L2)                                                                                                                |
|-----|-----|--------|------|----------|------|------|------|------|------|------|------------------------------------------------------------------------------------------------------------------------|------------------------------------------------------------------------------------------------------------------------|
| B1  | 5   | M      | 51.5 | 52       | 21   | 1    | 4    | 7    | 5    | 4    | Uncle Grandpa<br>S3E04 "Uncle Easter",<br>Cartoon Network Studios, 2016                                                | Teen Titans Go! To the Movies<br>Warner Bros. Animation, 2018                                                          |
| B2  | 5   | M      | 51   | 52       | 32   | 6    | 7    | 3    | 10   | 6    | Wile E. Coyote & Road Runner<br>"Coyote falls", ""Fur of flying" and "Rabid rider" episodes,<br>Acme Corporation, 2010 | ABCs song<br>Little Baby Bum - Nursery Rhymes & Kids Songs<br>youtube channel, 2014                                    |
| B3  | 13  | M      | 57   | 56       | 26   | 6    | 3    | 4    | 7    | 6    | The Simpsons<br>S29E02 "Springfield Splendor",<br>20th Television, 2017                                                | Futurama,<br>S7E01 "The Bots and the Bees",<br>Comedy Central, 2012                                                    |
| B4  | 12  | M      | 56   | 56       | 44   | 8    | 8    | 11   | 13   | 4    | The Incredibles<br>Disney-Pixar, 2004                                                                                  | Wile E. Coyote & Road Runner<br>"Coyote falls", ""Fur of flying" and "Rabid rider" episodes,<br>Acme Corporation, 2010 |
| B5  | 12  | M      | 56   | 56       | 25   | 1    | 4    | 10   | 0    | 10   | Big Hero 6<br>Walt Disney Pictures, 2014                                                                               | The Amazing World of Gumball<br>S01E01 "The DVD",<br>Cartoon Network Development Studio Europe, 2011                   |
| B6  | 6   | F      | 53   | 52       | 17   | 1    | 1    | 4    | 8    | 3    | Inside out<br>Disney-Pixar, 2015                                                                                       | Floopaloo<br>S1E22 "Squirrel for a Day",<br>Marc du Pontavice, 2012                                                    |
| B7  | 7   | M      | 53   | 52       | 24   | 2    | 4    | 1    | 12   | 5    | The Chipmunks<br>"Bye, George" episode,<br>DIC Entertainment, 1989                                                     | Floopaloo<br>S1E22 "Squirrel for a Day",<br>Marc du Pontavice, 2012                                                    |
| B8  | 4   | F      | 50.5 | 52       | 38   | 6    | 11   | 7    | 11   | 3    | Frozen<br>Walt Disney Pictures, 2013                                                                                   | Bolt<br>Walt Disney Pictures, 2008                                                                                     |
| B9  | 4   | M      | 52   | 52       | 42   | 1    | 11   | 11   | 13   | 6    | Spider-Man: Into the Spider-Verse<br>Columbia Pictures, 2018                                                           | Bolt<br>Walt Disney Pictures, 2008                                                                                     |
| B10 | 4   | M      | 51   | 52       | n.a. | n.a. | n.a. | n.a. | n.a. | n.a. | Cars<br>Walt Disney Pictures, 2006                                                                                     | Thomas & Friends<br>"Diesel and the duckling" episode,<br>Mattel, 2019                                                 |
| B11 | 9   | F      | 54   | 56       | 28   | 2    | 6    | 3    | 13   | 4    | The Simpsons<br>S29E02 "Springfield Splendor",<br>20th Television, 2017                                                | Zig & Sharko<br>S01E28 "Moby Zig",<br>Xilam Animation, 2010                                                            |
| B12 | 8   | M      | 54.5 | 56       | 26   | 4    | 5    | 5    | 4    | 8    | Beauty and the Beast<br>Walt Disney Pictures,1994                                                                      | Ice Age<br>Blue Sky Studios, 2002                                                                                      |
| B13 | 4   | M      | 53   | 56       | 44   | 11   | 9    | 8    | 9    | 7    | Finding Nemo<br>Disney-Pixar 2003                                                                                      | 101 Dalmatians<br>Walt Disney Productions,1961                                                                         |
| B14 | 6   | M      | 53   | 52       | 36   | 5    | 2    | 3    | 19   | 7    | Trolls<br>DreamWorks Animation, 2016                                                                                   | Curious George<br>S1E03 "Zeros to Donuts",<br>Universal Animation Studios, 2006                                        |
| B15 | 7   | M      | 51.5 | 52       | 49   | 12   | 8    | 10   | 9    | 10   | Cars<br>Walt Disney Pictures, 2006                                                                                     | Pup Academy<br>S1E02 "Tell Us About Your Human Day",<br>Air Bud Entertainment, 2019                                    |
| B16 | 10  | F      | 55   | 56       | 48   | 9    | 9    | 10   | 10   | 10   | Frozen<br>Walt Disney Pictures, 2013                                                                                   | Descendants<br>Disney Channel Original Productions, 2015                                                               |
| B17 | 10  | M      | 54   | 56       | 40   | 9    | 5    | 7    | 13   | 6    | The Simpsons<br>S29E02 "Springfield Splendor",<br>20th Television, 2017                                                | Uncle Grandpa<br>S3E04 "Uncle Easter",<br>Cartoon Network Studios, 2016                                                |
| B18 | 4   | F      | 49.5 | 52       | 19   | 2    | 3    | 5    | 6    | 3    | Frozen<br>Walt Disney Pictures, 2013                                                                                   | Bing<br>S1E06 "Smoothie",<br>Tandem Films e Digitales Studios, 2014                                                    |
| B19 | 7   | M      | 54   | 56       | 19   | 2    | 3    | 5    | 6    | 3    | Ranger Rob<br>S1E12 "Big Stink in Big Sky Park"<br>Nelvana Enterprises Inc, 2016                                       | Arex&Vastatore<br>"Casket of fear" episode<br>Arex&Vastatore YouTube Channel, 2021                                     |
